# Supplementary material for: Effect of nutritionally modified infant formula on academic performance: linkage of seven dormant randomised controlled trials to national education data
Source: PubMed Central journal article supplement (PMC8579423; doi:10.1136/bmj-2021-065805), 2021-11-11
Supplement: verm065805.ww.pdf [file verm065805.ww.pdf]

## Supplementary File

|                                                                                                                                                                                     |    |
|-------------------------------------------------------------------------------------------------------------------------------------------------------------------------------------|----|
| Supplement 1: Characteristics of systematic reviews of RCTs and reported pooled results for all outcomes grouped by type of formula modification and characteristics at birth ..... | 2  |
| Overview of search terms and strategies for each modification .....                                                                                                                 | 6  |
| Supplement 2: Power calculations and primary outcomes for the original trials .....                                                                                                 | 14 |
| Post-linkage delta estimation for primary outcome.....                                                                                                                              | 15 |
| Supplement 3: Macronutrient compositions of intervention and control formulas in the different trials.....                                                                          | 16 |
| Supplement 4: Consistency of school outcomes with previous in-trial measurements. Pearson's correlation between cognitive measures (all trials combined).....                       | 17 |
| Supplement 5: Robust standard errors used in this study .....                                                                                                                       | 17 |
| Supplement 6: Baseline characteristics at randomisation, by trial .....                                                                                                             | 18 |
| Supplement 7: Primary, Secondary and Sensitivity analyses .....                                                                                                                     | 19 |

**Supplement 1: Characteristics of systematic reviews of RCTs and reported pooled results for all outcomes grouped by type of formula modification and characteristics at birth**

| Population | Study                                  | Intervention                                                      | Relative effect of intervention vs control (95% CI)                                            | Age                  | RCTs | % of participants followed-up (n/randomised) | With data from                                                                                      |
|------------|----------------------------------------|-------------------------------------------------------------------|------------------------------------------------------------------------------------------------|----------------------|------|----------------------------------------------|-----------------------------------------------------------------------------------------------------|
| Preterm    | Young 2016 (Systematic review of RCTs) | Nutrient-enriched post-discharge formula vs standard term formula | Weight (grams) MD 7.45 g lower (-141.84 to 126.93)                                             | 3-4 months post-term | 6    | 91% (523/576)                                | Koo 2006<br>Litmanovitz 2004<br>Lucas 1992<br>Lucas 2001<br>Roggero 2011<br>Roggero 2012            |
|            |                                        |                                                                   | Weight (grams) MD 35.54 g higher (-113.71 to 184.78)                                           | 6 months post-term   | 7    | 89% (576/646)                                | Atkinson 1999 Koo<br>2006 Litmanovitz<br>2004 Lucas 1992<br>Lucas 2001 Roggero<br>2011 Roggero 2012 |
|            |                                        |                                                                   | Crown-heel length (mm) MD 2.45 mm taller (-2.01 to 6.9)                                        | 3-4 months post-term | 6    | 91% (523/576)                                | Koo 2006<br>Litmanovitz 2004<br>Lucas 1992<br>Lucas 2001<br>Roggero 2011<br>Roggero 2012            |
|            |                                        |                                                                   | Crown-heel length (mm) MD 2.12 mm taller (-2.16 to 6.41)                                       | 6 months post-term   | 7    | 89% (576/646)                                | Atkinson 1999 Koo<br>2006 Litmanovitz<br>2004 Lucas 1992<br>Lucas 2001 Roggero<br>2011 Roggero 2012 |
|            |                                        |                                                                   | Head circumference (mm) MD 0.3 mm smaller (-2.86 to 2.26)                                      | 3-4 months post-term | 6    | 91% (523/576)                                | Koo 2006<br>Litmanovitz 2004<br>Lucas 1992<br>Lucas 2001<br>Roggero 2011<br>Roggero 2012            |
|            |                                        |                                                                   | Head circumference (mm) MD 2.28 mm larger (-0.28 to 4.83)                                      | 6 months post-term   | 7    | 89% (576/646)                                | Atkinson 1999 Koo<br>2006 Litmanovitz<br>2004 Lucas 1992<br>Lucas 2001 Roggero<br>2011 Roggero 2012 |
|            |                                        |                                                                   | Bayley Scales of Infant Development II: Mental Development Index MD 0.9 higher (-3.24 to 5.04) | 18 months            | 1    | 81% (184/228)                                | Lucas 2001                                                                                          |

|          |                                                                                             |                                                                |                                                                                                    |                                        |             |               |                                                                      |
|----------|---------------------------------------------------------------------------------------------|----------------------------------------------------------------|----------------------------------------------------------------------------------------------------|----------------------------------------|-------------|---------------|----------------------------------------------------------------------|
|          | Embleton RCT 10 year follow up*                                                             |                                                                | Wechsler Intelligence Scale for Children III full-scale IQ                                         | 10 years                               | 1           | 71% (92/129)  | Embleton 2021                                                        |
| SGA Term | Castanys-Muñoz 2017 (Systematic review that includes 2 RCTs, both reported in Singhal 2010) | Nutrient-enriched formula vs standard term formula             | Crown-heel length (cm) MD 1.1 cm taller (0.38 to 1.79)                                             | 9 months                               | 1           | 83% (247/299) | Singhal 2010                                                         |
|          |                                                                                             |                                                                | Crown-heel length (cm) MD 1 cm taller (0.25 to 1.83)                                               | 18 months                              | 1           | 80% (240/299) | Singhal 2010                                                         |
|          |                                                                                             |                                                                | Head circumference (mm) MD 0.5 wider (0.1 to 0.9)                                                  | 9 months                               | 1           | 83% (247/299) | Singhal 2010                                                         |
|          |                                                                                             |                                                                | Head circumference (mm) MD 0.6 wider (0.2 to 1.1)                                                  | 18 months                              | 1           | 80% (240/299) | Singhal 2010                                                         |
|          |                                                                                             |                                                                | Knobloch, Pasamanick, and Sherrard's developmental screening inventory MD 2.5 lower (-4.6 to -0.4) | 9 months                               | 1           | 82% (246/299) | Singhal 2010                                                         |
|          |                                                                                             |                                                                | Bayley Scales of Infant Development II: Mental Development Index MD 1.5 lower (-5.1 to 2.0)        | 18 months                              | 1           | 79% (235/299) | Singhal 2010                                                         |
|          |                                                                                             |                                                                | Per cent body fat MD 38.7% higher (9.6 to 67.8%)                                                   | 6-8 years                              | 1           | 51% (153/299) | Singhal 2010                                                         |
|          |                                                                                             |                                                                | Per cent body fat MD 18% higher (0.3 to 36%)                                                       | 6-8 years                              | 1           | 37% (90/246)  | Singhal 2010                                                         |
|          |                                                                                             |                                                                | Blood pressure (diastolic) MD 3.5 mm Hg higher (0.7 to 6.2 mm Hg)                                  | 6-8 years                              | 1           | 51% (153/299) | Singhal 2010                                                         |
| Preterm  | Moon 2016 (Systematic review of RCTs)                                                       | LCPUFA-supplemented infant formula vs standard preterm formula | Bayley Scales of Infant Development II: Mental Development Index MD 0.96 higher (-1.42 to 3.34)    | 12 months post-term                    | 4           | 58% (364/633) | Carlson 1992<br>Fang 2005<br>O'Connor 2001<br>van Wezel 2002         |
|          |                                                                                             |                                                                | Bayley Scales of Infant Development II: Mental Development Index MD 0.7 lower (-2.63 to 1.23)      | 18 months post-term                    | 3           | 62% (494/795) | Clandinin 2005<br>Fewtrell 2002<br>Fewtrell 2004                     |
|          |                                                                                             |                                                                | Weight (kg) MD 0.10 lower (-0.31 to 0.12)                                                          | 12 months post-term                    | 4           | 43% (271/636) | Carlson 1996<br>Clandinin 2005<br>Groh-Wargo 2005<br>Vanderhoof 1999 |
|          |                                                                                             |                                                                | Length (cm) MD 0.25 smaller ( $\geq$ 0.33 to 0.84)                                                 | 12 months post-term                    | 4           | 43% (271/636) | Carlson 1996<br>Clandinin 2005<br>Groh-Wargo 2005<br>Vanderhoof 1999 |
|          | Verfuerden 2020 (Systematic review of RCTs)                                                 |                                                                |                                                                                                    | WASI IQ MD 7.71 lower (-24.63 to 9.22) | 10-17 years | 2             | 29% (124/434)                                                        |
| Term     | Jasani 2017 (Systematic                                                                     | LCPUFA-supplemented infant                                     | Visual acuity MD 0.01 lower (-0.12 to 0.11)                                                        | 12 months                              | 3           | 44% (256/577) | Auestad 1997<br>Auestad 2001                                         |

|      |                                             |                                                                                                     |                                                                                                 |           |   |                                                                   |                                                                           |
|------|---------------------------------------------|-----------------------------------------------------------------------------------------------------|-------------------------------------------------------------------------------------------------|-----------|---|-------------------------------------------------------------------|---------------------------------------------------------------------------|
|      | review of RCTs)                             | formula vs standard term formula                                                                    |                                                                                                 |           |   |                                                                   | Carlson 1996                                                              |
|      |                                             |                                                                                                     | Sweep VEP acuity MD 0.15 lower (-0.17 to -0.13)                                                 | 12 months | 3 | 69% (244/352)                                                     | Birch 1998<br>Birch 2005<br>Birch 2010                                    |
|      |                                             |                                                                                                     | Bayley Scales of Infant Development II: Mental Development Index MD 0.06 higher (-2.01 to 2.14) | 18 months | 4 | 76% (661/873)                                                     | Birch 1998<br>Birch 2010<br>Bouwstra 2005<br>Lucas 1999                   |
|      |                                             |                                                                                                     | Weight z-score MD 0.23 SD lower (-0.40 to -0.06)                                                | 12 months | 5 | 60% (521/871)                                                     | Agostoni 1995<br>Auestad 1997<br>Auestad 2001<br>Birch 2005<br>Birch 2010 |
|      |                                             |                                                                                                     | Length z-score MD 0.04 lower (-0.19 to 0.11)                                                    | 12 months | 5 | 60% (521/871)                                                     | Agostoni 1995<br>Auestad 1997<br>Auestad 2001<br>Birch 2005<br>Birch 2010 |
|      |                                             |                                                                                                     | Head circumference MD 0.13 smaller (-0.32 to 0.05)                                              | 12 months | 4 | 51% (464/911)                                                     | Auestad 2001<br>Bouwstra 2005<br>Makrides 1999<br>Morris 2000             |
|      | Verfuerden 2020 (Systematic review of RCTs) |                                                                                                     | WPPSI IQ MD 0.04 lower (-5.94 to 5.85)                                                          | 4-6 years | 4 | 62% in trials where original number randomised is known (578/939) | Lucas unpublished<br>Willats 2013<br>Birch 2007<br>Colombo 2013           |
| Term | Santiago Chile Preventive Trial (RCT)       | Iron-fortified follow-on formula vs formula with no added iron in healthy term infants              | Weight for age z-score any vs none MD 0.08 lower (-0.19 to 0.03)                                | 12 months | 1 | 92% (1657/1798)                                                   | Lozoff 2003                                                               |
|      |                                             |                                                                                                     | Length for age z-score any vs none MD 0.12 lower (-0.22 to -0.02)                               | 12 months | 1 | 92% (1657/1798)                                                   | Lozoff 2003                                                               |
|      |                                             |                                                                                                     | Bayley Scales of Infant Development I: Mental Development Index MD 0.7 lower (-2.63 to 1.23)    | 12 months | 1 | 92% (1613/1798)                                                   | Lozoff 2003                                                               |
|      |                                             | Iron-fortified follow-on formula (12.7 mg/L) vs low iron (2.3 mg/L) formula in healthy term infants | Bayley Scales of Infant Development I: Mental Development Index MD 1.5 higher (-0.7 to 3.71)    | 12 months | 3 | 42% (473/1123)                                                    | Lozoff 2012                                                               |
|      |                                             |                                                                                                     | IQ, WISC: 0.13 lower (-0.25 to -0.01)                                                           | 10 years  | 1 | 42% (473/1123)                                                    | Lozoff 2012                                                               |
|      |                                             |                                                                                                     | Arithmetic achievement, WRAT 2.4 lower (-4.5 to -0.3)                                           | 16 years  | 1 | 36% (403/1123)                                                    | Gahagan 2019                                                              |

|      |                             |                                                                                                                               |                                                                                                                                                                                                                                                                                                                                                                                                                              |           |   |                                                                              |                       |  |
|------|-----------------------------|-------------------------------------------------------------------------------------------------------------------------------|------------------------------------------------------------------------------------------------------------------------------------------------------------------------------------------------------------------------------------------------------------------------------------------------------------------------------------------------------------------------------------------------------------------------------|-----------|---|------------------------------------------------------------------------------|-----------------------|--|
| Term | Morley 1999 (RCT)           | Iron-fortified follow-on formula (12mg/100ml) vs low iron (0.9 mg/100ml) formula in healthy term infants                      | Bayley Scales of Infant Development II: Mental Development Index MD 0.6 lower (-3.40 to 2.20)                                                                                                                                                                                                                                                                                                                                | 18 months | 1 | 82% (268/327)                                                                | Morley 1999           |  |
|      |                             |                                                                                                                               | Head circumference (cm) MD 0.1 cm wider (-0.27 to 0.47)                                                                                                                                                                                                                                                                                                                                                                      | 18 months | 1 | 82% (268/327)                                                                | Morley 1999           |  |
|      |                             |                                                                                                                               | Length (cm) MD 0 cm taller ( $\geq 0.71$ to 0.71)                                                                                                                                                                                                                                                                                                                                                                            | 18 months | 1 | 82% (268/327)                                                                | Morley 1999           |  |
|      |                             | Iron-fortified follow-on formula (12mg/100ml) vs cows's milk (approx. 0.05mg/l) in healthy term infants                       | Bayley Scales of Infant Development II: Mental Development Index MD 2.3 lower (-4.87 to 0.27)                                                                                                                                                                                                                                                                                                                                | 18 months | 1 | 89% (293/328)                                                                | Morley 1999           |  |
|      |                             |                                                                                                                               | Head circumference (cm) MD 0.1 cm wider (-0.27 to 0.47)                                                                                                                                                                                                                                                                                                                                                                      | 18 months | 1 | 89% (293/328)                                                                | Morley 1999           |  |
|      |                             |                                                                                                                               | Length (cm) MD 0.3 cm smaller ( $\geq 1.01$ to 0.41)                                                                                                                                                                                                                                                                                                                                                                         | 18 months | 1 | 89% (293/328)                                                                | Morley 1999           |  |
|      | Iglesias Vázquez 2019 (RCT) | Iron-fortified follow-on formula (1.2 mg/100ml) vs low iron (0.4 mg/100ml) formula between 6-9 months in healthy term infants | Bayley Scales of Infant Development II: Mental Development Index MD 3.3 points higher in intervention group (p=0.217)<br>Head circumference (cm) MD 0.8 cm wider in intervention group (p=0.012) *difference was already statistically significant at randomisation (6 months)<br>Length (cm) MD 1.8 cm taller in intervention group (p=0.007) *difference was already statistically significant at randomisation (6 months) | 12 months | 1 | 94% (133/142)<br>* 28 infants in control group and 105 in intervention group | Iglesias Vázquez 2019 |  |
|      | Term                        | No studies with cognitive ability outcomes found                                                                              |                                                                                                                                                                                                                                                                                                                                                                                                                              |           |   |                                                                              |                       |  |
|      | Term                        | No studies with cognitive ability outcomes found                                                                              |                                                                                                                                                                                                                                                                                                                                                                                                                              |           |   |                                                                              |                       |  |

CI = Confidence Interval, MD = Mean difference, RCT= Randomised Controlled Trial, IQ= Intelligence Quotient, SGA= Small for gestational age; \*added post-hoc

## Overview of search terms and strategies for each modification

The search terms to identify systematic reviews in MEDLINE® and EMBASE were adapted from the Scottish Intercollegiate Guidelines Network.

### MEDLINE® terms for cognitive ability

("Cognition"[MeSH Terms] OR "Child Development"[Mesh] OR "Intelligence"[Mesh] OR "Brain/growth and development"[Mesh] OR "Cognition"[TIAB] OR "Child Development"[TIAB] OR "Intelligence"[TIAB] OR "Cognitive function"[TIAB] OR "Learning"[TIAB] OR "Cognitive test"[TIAB] OR "Brain"[TIAB] OR "neuro\*development"[TIAB] OR "educational status"[MeSH Terms] OR "education\*"[TIAB] OR "educational status"[TIAB] OR "schools"[MeSH Terms] OR "schools"[TIAB] OR "school"[TIAB] OR attainment[TIAB] OR "Bayley"[TIAB])

### MEDLINE® terms for infant nutrition

AND ("Infant Formula"[Mesh] OR "Infant Food"[Mesh] OR "Infant Nutritional Physiological Phenomena"[Mesh] OR "Food, Fortified"[MAJR] OR "Nutritional Support"[TIAB] OR "follow\*on\*formula"[TIAB] OR "supplementation"[TIAB])

### MEDLINE® terms for study population

((("infant"[MeSH Terms] OR "child"[MeSH Terms] OR "adolescent"[MeSH Terms]) OR (infant[TIAB] OR child[TIAB] OR adolescent[TIAB]))

### MEDLINE® terms for systematic review of RCTs

(Review[ptyp] OR ((systematic review[ti] OR meta-analysis[pt] OR meta-analysis[ti] OR systematic literature review[ti] OR this systematic review[tw] OR pooling project[tw] OR (systematic review[tiab] AND review[pt]) OR meta synthesis[ti] OR (meta analysis[ti] OR meta analyses[ti] OR meta analyse[ti] OR meta analysed[ti] OR meta analyser[ti] OR meta analyses[ti] OR meta analysing[ti] OR meta analysis[ti] OR meta analysis.[ti] OR meta analysisdagger[ti] OR meta analysis of[ti] OR meta analyst[ti] OR meta analyticians[ti] OR meta analysts[ti] OR meta analysys[ti] OR meta analytic[ti] OR meta analytical[ti] OR meta analytically[ti] OR meta analyze[ti] OR meta analyzed[ti] OR meta analyzes[ti] OR meta analyzing[ti] OR integrative review[tw] OR integrative research review[tw] OR rapid review[tw] OR umbrella review[tw] OR consensus development conference[pt] OR practice guideline[pt] OR drug class reviews[ti] OR "Cochrane Database Syst Rev"[Journal] OR "ACP J Club"[Journal] OR "Health Technol Assess"[Journal] OR "Evid Rep Technol Assess (Summ)"[Journal] OR "JBI Database System Rev Implement Rep"[Journal]) OR (clinical guideline[tw] AND management[tw]) OR ((evidence based[ti] OR "evidence-based medicine"[MeSH Terms] OR (best practice[ti] OR best practices[ti]) OR evidence synthesis[tiab]) AND (review[pt] OR diseases category[mh] OR "behaviour and behaviour mechanisms"[MeSH Terms] OR "therapeutics"[MeSH Terms] OR evaluation studies[pt] OR validation studies[pt] OR guideline[pt] OR pmcbook[All Fields])) OR ((systematic[tw] OR systematically[tw] OR critical[tiab] OR study selection[tw] OR (predetermined[tw] OR inclusion[tw] AND (criteri[tw] OR criteria[tw] OR criteria'[tw] OR criteria'double[tw] OR criteria's[tw] OR criteria'srandomized[tw] OR criteria1[tw] OR criteria2[tw] OR criteriaadult[tw] OR criteriaall[tw] OR criteriaare[tw] OR criteriabased[tw] OR criteriadisulfiram[tw] OR criteriae[tw] OR criteriaeditorials[tw] OR criteriaen[tw] OR criteriaenglish[tw] OR criteriaexclusion[tw] OR criteriafor[tw] OR criteriafora[tw] OR criteriaheath[tw] OR criteriiai[tw] OR criteriaincluded[tw] OR criteriiaihte[tw] OR criterial[tw] OR criterialism[tw] OR criteriality[tw] OR criteriall[tw] OR criterially[tw] OR criterials[tw] OR criterian[tw] OR criteriaof[tw] OR criteriar[tw] OR criteriarandomised[tw] OR criteriarpar[tw] OR criterias[tw] OR criteriasof[tw] OR criteriastudies[tw] OR criteriasystematic[tw] OR criteriathe[tw] OR criteriation[tw] OR criteriatrade[tw] OR criterium[tw] OR criterium[tw] OR criteriawerehaving[tw] OR criteric[tw] OR criterid[tw] OR criterien[tw] OR criteries[tw] OR criteriia[tw] OR criterin[tw] OR criterio[tw] OR criterioe[tw] OR criteriologic[tw] OR criteriological[tw] OR criteriology[tw] OR criterion[tw] OR criterion'[tw] OR criterion's[tw] OR criterional[tw] OR criterionby[tw] OR criterionis[tw] OR criterionoriented[tw] OR criterions[tw] OR criterior[tw] OR criteriors[tw] OR criterios[tw] OR criteriosa[tw] OR criteriosamente[tw] OR criteriosof[tw] OR criterious[tw] OR criteris[tw] OR criterita[tw] OR criterium[tw] OR criterium'[tw] OR criteriums[tw] OR criterization[tw])) OR (exclusion criteria[tw] OR exclusion criterias[tw] OR exclusion criterion[tw] OR exclusion criterions[tw] OR exclusion criterium[tw]) OR main outcome measures[tw] OR standard of care[tw] OR standards of care[tw]) AND (survey[tiab] OR surveys[tiab] OR (overview[tw] OR overview'[tw] OR overview's[tw] OR overview2[tw] OR overviewed[tw] OR overviewer[tw] OR overviewers[tw] OR overviews[tw] OR overviewing[tw] OR overviewn[tw] OR overviewon[tw] OR overviewpredictive[tw] OR overviewprognostic[tw] OR overviews[tw] OR overviews'[tw] OR overviews"[tw] OR overviewstudy[tw]) OR review[tiab] OR reviews[tiab] OR (search[tw] OR search'[tw] OR search's[tw] OR search010[tw] OR search013[tw] OR search1[tw] OR search5[tw] OR searchability[tw] OR searchable[tw] OR searchableby[tw] OR searchall[tw] OR searchamerica[tw] OR searchand[tw] OR searchback[tw] OR searchbreast[tw] OR searchcoil[tw] OR searchcompare[tw] OR searchdb[tw] OR searchdisease[tw] OR searchdogs[tw] OR searche[tw] OR searcheable[tw] OR searched[tw] OR searched'[tw] OR searched19[tw] OR searchedfor[tw] OR searchedmedline[tw] OR searchedwas[tw] OR searcheed[tw] OR searchen[tw] OR searcher[tw] OR searcher'[tw] OR searcher's[tw] OR searchers[tw] OR searchers'[tw] OR searches[tw] OR searches'[tw] OR searchescohorts[tw] OR searchfor[tw] OR searchform[tw] OR searchgenes[tw] OR searchgtr[tw] OR searchgui[tw] OR searchhes[tw] OR searchin[tw] OR searchin'[tw] OR searching[tw] OR searching'[tw] OR searchinger[tw] OR searchingfor[tw] OR searchingly[tw] OR searchings[tw] OR searchlight[tw] OR searchlight'[tw] OR searchlights[tw] OR searchlighttrade[tw] OR searchline[tw]

OR searchlite[tw] OR searchlyte[tw] OR searchmedica[tw] OR searchomyces[tw] OR searchpageeng[tw] OR searchpath[tw] OR searchpaths[tw] OR searchpatterns[tw] OR searchpattool[tw] OR searchpkcs[tw] OR searchproj[tw] OR searchresult[tw] OR searches[tw] OR searchshowed[tw] OR searchsmallrna[tw] OR searchsnp[tw] OR searchsv[tw] OR searchtm[tw] OR searchtrade[tw] OR searchtxt[tw] OR searchtype[tw] OR searchwise[tw] OR searchxlinks[tw] OR handsearch[tw] OR analysis[ti] OR critique[tiab] OR appraisal[tw] OR (reduction[tw] AND ("risk"[MeSH Terms] OR risk[tw])) AND (("death"[MeSH Terms] OR "death"[All Fields]) OR ("recurrence"[MeSH Terms] OR "recurrence"[All Fields])))) AND (literature[tiab] OR articles[tiab] OR publications[tiab] OR publication[tiab] OR bibliography[tiab] OR bibliographies[tiab] OR published[tiab] OR pooled data[tw] OR unpublished[tw] OR citation[tw] OR citations[tw] OR database[tiab] OR internet[tiab] OR textbooks[tiab] OR references[tw] OR scales[tw] OR papers[tw] OR datasets[tw] OR trials[tiab] OR (meta analysis[tw] OR meta analysis[ti] OR meta analysable[tw] OR meta analysas[tw] OR meta analyse[tw] OR meta analysed[tw] OR meta analysei[tw] OR meta analysen[tw] OR meta analyser[tw] OR meta analysers[tw] OR meta analyses[tw] OR meta analysescohort[tw] OR meta analysespublication[tw] OR meta analysestype[tw] OR meta analysis[ti] OR meta analysia[tw] OR meta analysisic[tw] OR meta analysing[tw] OR meta analysisis[tw] OR meta analysis's[tw] OR meta analysis.[tw] OR meta analysis12[tw] OR meta analysis2[tw] OR meta analysisbone[tw] OR meta analysisdagger[tw] OR meta analyseses[tw] OR meta analysisevaluating[tw] OR meta analysisisif[tw] OR meta analysisindicated[tw] OR meta analysisintroduction[tw] OR meta analysisjr[tw] OR meta analysismethods[tw] OR meta analysismoderate[tw] OR meta analysisof[tw] OR meta analysistrade[tw] OR meta analysisv[tw] OR meta analysisxs[tw] OR meta analyzed[tw] OR meta analyst[tw] OR meta analyticians[tw] OR meta analysts[tw] OR meta analysys[tw] OR meta analytic[tw] OR meta analytical[tw] OR meta analytically[tw] OR meta analytics[tw] OR meta analyzeable[tw] OR meta analyze[tw] OR meta analyzed[tw] OR meta analyzes[tw] OR meta analyzing[tw]) OR (clinical[tiab] AND studies[tiab]) OR "treatment outcome"[MeSH Terms] OR treatment outcome[tw] OR pmcbook[All Fields])) NOT (letter[pt] OR newspaper article[pt]) OR (((randomized controlled trial[pt]) OR (controlled clinical trial[pt]) OR (randomized[tiab] OR randomised[tiab]) OR (placebo[tiab]) OR (drug therapy[sh]) OR (randomly[tiab]) OR (trial[tiab]) OR (groups[tiab])) NOT (animals[mh] NOT humans[mh])))

#### Enriched post-discharge formula for preterm infants

##### Embase

| #  | Searches                                                                                                                                                                                                                   |
|----|----------------------------------------------------------------------------------------------------------------------------------------------------------------------------------------------------------------------------|
| 1  | exp Meta Analysis/                                                                                                                                                                                                         |
| 2  | ((meta adj analy\$) or metaanalys\$).tw.                                                                                                                                                                                   |
| 3  | (systematic adj (review\$1 or overview\$1)).tw.                                                                                                                                                                            |
| 4  | or/1-3                                                                                                                                                                                                                     |
| 5  | cancerlit.ab.                                                                                                                                                                                                              |
| 6  | cochrane.ab.                                                                                                                                                                                                               |
| 7  | embase.ab.                                                                                                                                                                                                                 |
| 8  | (psychlit or psyclit).ab.                                                                                                                                                                                                  |
| 9  | (psychinfo or psycinfo).ab.                                                                                                                                                                                                |
| 10 | (cinahl or cinhal).ab.                                                                                                                                                                                                     |
| 11 | science citation index.ab.                                                                                                                                                                                                 |
| 12 | bids.ab.                                                                                                                                                                                                                   |
| 13 | or/5-12                                                                                                                                                                                                                    |
| 14 | reference lists.ab.                                                                                                                                                                                                        |
| 15 | bibliograph\$.ab.                                                                                                                                                                                                          |
| 16 | hand-search\$.ab.                                                                                                                                                                                                          |
| 17 | manual search\$.ab.                                                                                                                                                                                                        |
| 18 | relevant journals.ab.                                                                                                                                                                                                      |
| 19 | or/14-18                                                                                                                                                                                                                   |
| 20 | data extraction.ab.                                                                                                                                                                                                        |
| 21 | selection criteria.ab.                                                                                                                                                                                                     |
| 22 | 20 or 21                                                                                                                                                                                                                   |
| 23 | review.pt.                                                                                                                                                                                                                 |
| 24 | 22 and 23                                                                                                                                                                                                                  |
| 25 | letter.pt.                                                                                                                                                                                                                 |
| 26 | editorial.pt.                                                                                                                                                                                                              |
| 27 | animal/                                                                                                                                                                                                                    |
| 28 | human/                                                                                                                                                                                                                     |
| 29 | 27 not (27 and 28)                                                                                                                                                                                                         |
| 30 | or/25-26,29                                                                                                                                                                                                                |
| 31 | 4 or 13 or 19 or 24                                                                                                                                                                                                        |
| 32 | 31 not 30                                                                                                                                                                                                                  |
| 33 | infant nutrition.tw. or exp infant nutrition/ or nutritional support.tw. or exp nutritional support/ or infant\$food.tw. or infant\$diet.tw. or baby\$food.tw. or baby\$diet.tw. or exp baby food/ or exp artificial milk/ |

|    |                                                                                                                                                                                                                                                                                                                                                                                                                                                                                                                                                                                                                                                                                                                                                                                                                                                                                                                         |
|----|-------------------------------------------------------------------------------------------------------------------------------------------------------------------------------------------------------------------------------------------------------------------------------------------------------------------------------------------------------------------------------------------------------------------------------------------------------------------------------------------------------------------------------------------------------------------------------------------------------------------------------------------------------------------------------------------------------------------------------------------------------------------------------------------------------------------------------------------------------------------------------------------------------------------------|
| 34 | exp cognition assessment/ or Cognition.tw. or exp cognition/ or exp social cognition/ or IQ.tw. or intelligence.tw. or exp Wechsler adult intelligence scale/ or exp intelligence quotient/ or exp Wechsler intelligence scale/ or exp "Wechsler preschool and primary scale of intelligence"/ or exp intelligence/ or exp Wechsler intelligence scale for children/ or exp intelligence test/ or exp emotional intelligence/ or Intelligence.mp. or exp Stanford-Binet Intelligence Scale/ or (neurodevelopment or cognitive).tw. or child\$development.tw. or exp child development/ or exp neuropsychological test/ or exp child development/ or exp "Bayley Scales of Infant Development"/ or exp mental development/ or bayley.tw. or exp reading/ or exp school/ or exp learning disorder/ or exp educational status/ or exp education/ or exp achievement/ or exp academic achievement/ or school attainment.tw. |
| 35 | (child\$ or infant\$ or baby or babies or adolescent\$ or teenager\$).tw.                                                                                                                                                                                                                                                                                                                                                                                                                                                                                                                                                                                                                                                                                                                                                                                                                                               |
| 36 | dietary proteins.tw. or exp protein intake/ or energy intake.tw. or exp caloric intake/ or enriched formula.tw. or exp enteric feeding/ or exp diet supplementation/ or preterm\$formula.tw.                                                                                                                                                                                                                                                                                                                                                                                                                                                                                                                                                                                                                                                                                                                            |
| 37 | exp premature labor/ or exp prematurity/ or exp low birth weight/ or preterm\$.tw. or premie\$.tw. or low gestational age.tw. or low birthweight.tw. or exp low birth weight/ or small for gestational age.tw. or small\$for\$date\$.tw. or exp small for date infant/                                                                                                                                                                                                                                                                                                                                                                                                                                                                                                                                                                                                                                                  |
| 38 | exp hospital discharge/ or post\$discharge.tw. or after\$discharge.tw. or following\$discharge.tw. or hospital\$discharge.tw.                                                                                                                                                                                                                                                                                                                                                                                                                                                                                                                                                                                                                                                                                                                                                                                           |
| 39 | 32 and 33 and 34 and 35 and 36 and 37 and 38                                                                                                                                                                                                                                                                                                                                                                                                                                                                                                                                                                                                                                                                                                                                                                                                                                                                            |

#### MEDLINE

MEDLINE terms for cognitive ability, study population, premature infants, systematic review and infant nutrition (see above) plus:

|                                                                                                                                                                                                                                                                                                                                                                |
|----------------------------------------------------------------------------------------------------------------------------------------------------------------------------------------------------------------------------------------------------------------------------------------------------------------------------------------------------------------|
| Dietary Proteins"[Mesh] OR "Energy Intake"[Mesh] OR "Nutritional Support"[Mesh] OR "Dietary Proteins"[TIAB] OR "Energy Intake"[TIAB] OR "enriched formula"[TIAB] OR "supplemented formula"[TIAB] OR "Nutrient*enriched"[TIAB] OR "preterm*formula"[TIAB] AND (("Hospital*"[TIAB] OR Discharge[TIAB]) AND ("after"[TIAB] OR "post"[TIAB] OR "following"[TIAB])) |
|----------------------------------------------------------------------------------------------------------------------------------------------------------------------------------------------------------------------------------------------------------------------------------------------------------------------------------------------------------------|

#### LCPUFA-enriched infant formula for preterm infants

Embase

| #  | Searches                                        |
|----|-------------------------------------------------|
| 1  | exp Meta Analysis/                              |
| 2  | ((meta adj analy\$) or metaanalys\$).tw.        |
| 3  | (systematic adj (review\$1 or overview\$1)).tw. |
| 4  | or/1-3                                          |
| 5  | cancerlit.ab.                                   |
| 6  | cochrane.ab.                                    |
| 7  | embase.ab.                                      |
| 8  | (psychlit or psyclit).ab.                       |
| 9  | (psychinfo or psycinfo).ab.                     |
| 10 | (cinahl or cinhal).ab.                          |
| 11 | science citation index.ab.                      |
| 12 | bids.ab.                                        |
| 13 | or/5-12                                         |
| 14 | reference lists.ab.                             |
| 15 | bibliograph\$.ab.                               |
| 16 | hand-search\$.ab.                               |
| 17 | manual search\$.ab.                             |
| 18 | relevant journals.ab.                           |
| 19 | or/14-18                                        |
| 20 | data extraction.ab.                             |
| 21 | selection criteria.ab.                          |
| 22 | 20 or 21                                        |
| 23 | review.pt.                                      |
| 24 | 22 and 23                                       |
| 25 | letter.pt.                                      |
| 26 | editorial.pt.                                   |
| 27 | animal/                                         |
| 28 | human/                                          |
| 29 | 27 not (27 and 28) (89 )                        |
| 30 | or/25-26,29                                     |
| 31 | 4 or 13 or 19 or 24                             |



|    |                                                                                                                                                                                                                                                                                                                                                                                                                                                                                                                                                                                                                                                                                                                                                                                                                                                                                                                         |
|----|-------------------------------------------------------------------------------------------------------------------------------------------------------------------------------------------------------------------------------------------------------------------------------------------------------------------------------------------------------------------------------------------------------------------------------------------------------------------------------------------------------------------------------------------------------------------------------------------------------------------------------------------------------------------------------------------------------------------------------------------------------------------------------------------------------------------------------------------------------------------------------------------------------------------------|
| 32 | 31 not 30                                                                                                                                                                                                                                                                                                                                                                                                                                                                                                                                                                                                                                                                                                                                                                                                                                                                                                               |
| 33 | infant nutrition.tw. or exp infant nutrition/ or nutritional support.tw. or exp nutritional support/ or infant\$food.tw. or infant\$diet.tw. or baby\$food.tw. or baby\$diet.tw. or exp baby food/ or exp artificial milk/                                                                                                                                                                                                                                                                                                                                                                                                                                                                                                                                                                                                                                                                                              |
| 34 | exp cognition assessment/ or Cognition.tw. or exp cognition/ or exp social cognition/ or IQ.tw. or intelligence.tw. or exp Wechsler adult intelligence scale/ or exp intelligence quotient/ or exp Wechsler intelligence scale/ or exp "Wechsler preschool and primary scale of intelligence"/ or exp intelligence/ or exp Wechsler intelligence scale for children/ or exp intelligence test/ or exp emotional intelligence/ or Intelligence.mp. or exp Stanford-Binet Intelligence Scale/ or (neurodevelopment or cognitive).tw. or child\$development.tw. or exp child development/ or exp neuropsychological test/ or exp child development/ or exp "Bayley Scales of Infant Development"/ or exp mental development/ or bayley.tw. or exp reading/ or exp school/ or exp learning disorder/ or exp educational status/ or exp education/ or exp achievement/ or exp academic achievement/ or school attainment.tw. |
| 35 | (child\$ or infant\$ or baby or babies or adolescent\$ or teenager\$.tw.                                                                                                                                                                                                                                                                                                                                                                                                                                                                                                                                                                                                                                                                                                                                                                                                                                                |
| 36 | exp fatty acids, omega-3/ or fatty acids, essential/ or Dietary Fats, Unsaturated/ or linolenic acids/ or exp fish oils/ or (n 3 fatty acid\$ or omega 3).tw. or docosahexa?noic.tw,hw,rw. or eicosapenta?noic.tw,hw,rw. or alpha linolenic.tw,hw,rw. or (linolenate or cervonic or timnodonic).tw,hw,rw. or menhaden oil\$.tw,hw,rw. or (mediterranean adj diet\$.tw. or ((flax or flaxseed or flax seed or linseed or rape seed or rapeseed or canola or soy or soybean or walnut or mustard seed) adj2 oil\$.tw. or (walnut\$ or butternut\$ or soybean\$ or pumpkin seed\$.tw. or (fish adj2 oil\$.tw. or (cod liver oil\$ or marine oil\$ or marine fat\$.tw. or (salmon or mackerel or herring or tuna or halibut or seal or seaweed or anchov\$.tw. or (fish consumption or fish intake or (fish adj2 diet\$)).tw. or diet\$ fatty acid\$.tw. or borage oil\$.tw.                                                |
| 37 | exp premature labor/ or exp prematurity/ or exp low birth weight/ or preterm\$.tw. or premie\$.tw. or low gestational age.tw. or low birthweight.tw. or exp low birth weight/ or small for gestational age.tw. or small\$for\$date\$.tw. or exp small for date infant/                                                                                                                                                                                                                                                                                                                                                                                                                                                                                                                                                                                                                                                  |
| 38 | 32 and 33 and 34 and 35 and 36 and 37                                                                                                                                                                                                                                                                                                                                                                                                                                                                                                                                                                                                                                                                                                                                                                                                                                                                                   |

#### MEDLINE

MEDLINE terms for cognitive ability, study population, premature infants, systematic review and infant nutrition (see above) plus:

("Fatty Acids, Unsaturated"[Mesh] OR "Arachidonic Acids"[Mesh] OR "Docosahexaenoic Acids"[Mesh] OR "LCPUFA"[TIAB] OR "PUFA"[TIAB] OR "Borage Oil"[TIAB] OR "Fish Oil"[TIAB] OR "Arachidonic Acids"[TIAB] OR "Docosahexaenoic Acids"[TIAB] OR "fatty acid"[TIAB] OR "omega 3"[TIAB])

#### LCPUFA-enriched infant formula for term infants

##### Embase

| #  | Searches                                        |
|----|-------------------------------------------------|
| 1  | exp Meta Analysis/                              |
| 2  | ((meta adj analy\$) or metaanalys\$.tw.         |
| 3  | (systematic adj (review\$1 or overview\$1)).tw. |
| 4  | or/1-3                                          |
| 5  | cancerlit.ab.                                   |
| 6  | cochrane.ab.                                    |
| 7  | embase.ab.                                      |
| 8  | (psychlit or psyclit).ab.                       |
| 9  | (psychinfo or psycinfo).ab.                     |
| 10 | (cinahl or cinhal).ab.                          |
| 11 | science citation index.ab.                      |
| 12 | bids.ab.                                        |
| 13 | or/5-12                                         |
| 14 | reference lists.ab.                             |
| 15 | bibliograph\$.ab.                               |
| 16 | hand-search\$.ab.                               |
| 17 | manual search\$.ab.                             |
| 18 | relevant journals.ab.                           |
| 19 | or/14-18                                        |
| 20 | data extraction.ab.                             |
| 21 | selection criteria.ab.                          |
| 22 | 20 or 21                                        |
| 23 | review.pt.                                      |
| 24 | 22 and 23                                       |
| 25 | letter.pt.                                      |
| 26 | editorial.pt.                                   |
| 27 | animal/                                         |
| 28 | human/                                          |

|    |                                                                                                                                                                                                                                                                                                                                                                                                                                                                                                                                                                                                                                                                                                                                                                                                                                                                                                                         |
|----|-------------------------------------------------------------------------------------------------------------------------------------------------------------------------------------------------------------------------------------------------------------------------------------------------------------------------------------------------------------------------------------------------------------------------------------------------------------------------------------------------------------------------------------------------------------------------------------------------------------------------------------------------------------------------------------------------------------------------------------------------------------------------------------------------------------------------------------------------------------------------------------------------------------------------|
| 29 | 27 not (27 and 28)                                                                                                                                                                                                                                                                                                                                                                                                                                                                                                                                                                                                                                                                                                                                                                                                                                                                                                      |
| 30 | or/25-26,29                                                                                                                                                                                                                                                                                                                                                                                                                                                                                                                                                                                                                                                                                                                                                                                                                                                                                                             |
| 31 | 4 or 13 or 19 or 24                                                                                                                                                                                                                                                                                                                                                                                                                                                                                                                                                                                                                                                                                                                                                                                                                                                                                                     |
| 32 | 31 not 30                                                                                                                                                                                                                                                                                                                                                                                                                                                                                                                                                                                                                                                                                                                                                                                                                                                                                                               |
| 33 | infant nutrition.tw. or exp infant nutrition/ or nutritional support.tw. or exp nutritional support/ or infant\$food.tw. or infant\$diet.tw. or baby\$food.tw. or baby\$diet.tw. or exp baby food/ or exp artificial milk/                                                                                                                                                                                                                                                                                                                                                                                                                                                                                                                                                                                                                                                                                              |
| 34 | exp cognition assessment/ or Cognition.tw. or exp cognition/ or exp social cognition/ or IQ.tw. or intelligence.tw. or exp Wechsler adult intelligence scale/ or exp intelligence quotient/ or exp Wechsler intelligence scale/ or exp "Wechsler preschool and primary scale of intelligence"/ or exp intelligence/ or exp Wechsler intelligence scale for children/ or exp intelligence test/ or exp emotional intelligence/ or Intelligence.mp. or exp Stanford-Binet Intelligence Scale/ or (neurodevelopment or cognitive).tw. or child\$development.tw. or exp child development/ or exp neuropsychological test/ or exp child development/ or exp "Bayley Scales of Infant Development"/ or exp mental development/ or bayley.tw. or exp reading/ or exp school/ or exp learning disorder/ or exp educational status/ or exp education/ or exp achievement/ or exp academic achievement/ or school attainment.tw. |
| 35 | (child\$ or infant\$ or baby or babies or adolescent\$ or teenager\$.tw.                                                                                                                                                                                                                                                                                                                                                                                                                                                                                                                                                                                                                                                                                                                                                                                                                                                |
| 36 | exp fatty acids, omega-3/ or fatty acids, essential/ or Dietary Fats, Unsaturated/ or linolenic acids/ or exp fish oils/ or (n 3 fatty acid\$ or omega 3).tw. or docosahexa?noic.tw,hw,rw. or eicosapenta?noic.tw,hw,rw. or alpha linolenic.tw,hw,rw. or (linolenate or cervonic or timnodonic).tw,hw,rw. or menhaden oil\$.tw,hw,rw. or (mediterranean adj diet\$.tw. or ((flax or flaxseed or flax seed or linseed or rape seed or rapeseed or canola or soy or soybean or walnut or mustard seed) adj2 oil\$.tw. or (walnut\$ or butternut\$ or soybean\$ or pumpkin seed\$.tw. or (fish adj2 oil\$.tw. or (cod liver oil\$ or marine oil\$ or marine fat\$.tw. or (salmon or mackerel or herring or tuna or halibut or seal or seaweed or anchov\$.tw. or (fish consumption or fish intake or (fish adj2 diet\$)).tw. or diet\$ fatty acid\$.tw. or borage oil\$.tw.                                                |
| 37 | 32 and 33 and 34 and 35 and 36                                                                                                                                                                                                                                                                                                                                                                                                                                                                                                                                                                                                                                                                                                                                                                                                                                                                                          |

MEDLINE terms for cognitive ability, study population, systematic review and infant nutrition (see above) plus:

|                                                                                                                                                                                                                                                                                     |
|-------------------------------------------------------------------------------------------------------------------------------------------------------------------------------------------------------------------------------------------------------------------------------------|
| ("Fatty Acids, Unsaturated"[Mesh] OR "Arachidonic Acids"[Mesh] OR "Docosahexaenoic Acids"[Mesh] OR "LCPUFA"[TIAB] OR "PUFA"[TIAB] OR "Borage Oil"[TIAB] OR "Fish Oil"[TIAB] OR "Arachidonic Acids"[TIAB] OR "Docosahexaenoic Acids"[TIAB] OR "fatty acid"[TIAB] OR "omega 3"[TIAB]) |
|-------------------------------------------------------------------------------------------------------------------------------------------------------------------------------------------------------------------------------------------------------------------------------------|

#### Iron-fortified infant formula

Embase

| #  | Searches                                        |
|----|-------------------------------------------------|
| 1  | exp Meta Analysis/                              |
| 2  | ((meta adj analy\$) or metaanalys\$.tw.         |
| 3  | (systematic adj (review\$1 or overview\$1)).tw. |
| 4  | or/1-3                                          |
| 5  | cancerlit.ab.                                   |
| 6  | cochrane.ab.                                    |
| 7  | embase.ab.                                      |
| 8  | (psychlit or psyclit).ab.                       |
| 9  | (psychinfo or psycinfo).ab.                     |
| 10 | (cinahl or cinhal).ab.                          |
| 11 | science citation index.ab.                      |
| 12 | bids.ab.                                        |
| 13 | or/5-12                                         |
| 14 | reference lists.ab.                             |
| 15 | bibliograph\$.ab.                               |
| 16 | hand-search\$.ab.                               |
| 17 | manual search\$.ab.                             |
| 18 | relevant journals.ab.                           |
| 19 | or/14-18                                        |
| 20 | data extraction.ab.                             |
| 21 | selection criteria.ab.                          |
| 22 | 20 or 21                                        |
| 23 | review.pt.                                      |
| 24 | 22 and 23                                       |
| 25 | letter.pt.                                      |
| 26 | editorial.pt.                                   |
| 27 | animal/                                         |
| 28 | human/                                          |
| 29 | 27 not (27 and 28)                              |

|    |                                                                                                                                                                                                                                                                                                                                                                                                                                                                                                                                                                                                                                                                                                                                                                                                                                                                                                                         |
|----|-------------------------------------------------------------------------------------------------------------------------------------------------------------------------------------------------------------------------------------------------------------------------------------------------------------------------------------------------------------------------------------------------------------------------------------------------------------------------------------------------------------------------------------------------------------------------------------------------------------------------------------------------------------------------------------------------------------------------------------------------------------------------------------------------------------------------------------------------------------------------------------------------------------------------|
| 30 | or/25-26,29                                                                                                                                                                                                                                                                                                                                                                                                                                                                                                                                                                                                                                                                                                                                                                                                                                                                                                             |
| 31 | 4 or 13 or 19 or 24                                                                                                                                                                                                                                                                                                                                                                                                                                                                                                                                                                                                                                                                                                                                                                                                                                                                                                     |
| 32 | 31 not 30                                                                                                                                                                                                                                                                                                                                                                                                                                                                                                                                                                                                                                                                                                                                                                                                                                                                                                               |
| 33 | infant nutrition.tw. or exp infant nutrition/ or nutritional support.tw. or exp nutritional support/ or infant\$food.tw. or infant\$diet.tw. or baby\$food.tw. or baby\$diet.tw. or exp baby food/ or exp artificial milk/                                                                                                                                                                                                                                                                                                                                                                                                                                                                                                                                                                                                                                                                                              |
| 34 | exp cognition assessment/ or Cognition.tw. or exp cognition/ or exp social cognition/ or IQ.tw. or intelligence.tw. or exp Wechsler adult intelligence scale/ or exp intelligence quotient/ or exp Wechsler intelligence scale/ or exp "Wechsler preschool and primary scale of intelligence"/ or exp intelligence/ or exp Wechsler intelligence scale for children/ or exp intelligence test/ or exp emotional intelligence/ or Intelligence.mp. or exp Stanford-Binet Intelligence Scale/ or (neurodevelopment or cognitive).tw. or child\$development.tw. or exp child development/ or exp neuropsychological test/ or exp child development/ or exp "Bayley Scales of Infant Development"/ or exp mental development/ or bayley.tw. or exp reading/ or exp school/ or exp learning disorder/ or exp educational status/ or exp education/ or exp achievement/ or exp academic achievement/ or school attainment.tw. |
| 35 | (child\$ or infant\$ or baby or babies or adolescent\$ or teenager\$).tw.                                                                                                                                                                                                                                                                                                                                                                                                                                                                                                                                                                                                                                                                                                                                                                                                                                               |
| 36 | exp iron metabolism/ or exp iron/ or exp iron blood level/ or exp iron deficiency/ or exp iron derivative/ or exp iron deficiency anemia/ or iron complex/ or exp iron intake/ or exp iron depletion/ or iron.tw. or ferritin\$.tw. or exp ferritin blood level/ or exp ferritin/ or Hemoglobin\$.tw.                                                                                                                                                                                                                                                                                                                                                                                                                                                                                                                                                                                                                   |
| 37 | 32 and 33 and 34 and 35 and 36                                                                                                                                                                                                                                                                                                                                                                                                                                                                                                                                                                                                                                                                                                                                                                                                                                                                                          |

#### MEDLINE

MEDLINE terms for cognitive ability, systematic review and infant nutrition (see above) plus:

|                                                                                                                                                                                                                     |
|---------------------------------------------------------------------------------------------------------------------------------------------------------------------------------------------------------------------|
| ("iron"[MeSH Terms] OR "Anemia, Iron-Deficiency"[Mesh] OR "Ferritins"[Mesh] OR "Iron, Dietary"[Mesh] OR "Hemoglobins"[Mesh] OR "iron"[TIAB] OR "Iron*Deficiency"[TIAB] OR "Ferritins"[TIAB] OR "Hemoglobins"[TIAB]) |
|---------------------------------------------------------------------------------------------------------------------------------------------------------------------------------------------------------------------|

#### Sn-2 Palmitate

##### Embase

| #  | Searches                                                                                                                                                                                                                   | Results  |
|----|----------------------------------------------------------------------------------------------------------------------------------------------------------------------------------------------------------------------------|----------|
| 1  | exp Meta Analysis/                                                                                                                                                                                                         | 144648   |
| 2  | ((meta adj analy\$) or metaanalys\$.tw.                                                                                                                                                                                    | 168465   |
| 3  | (systematic adj (review\$1 or overview\$1)).tw.                                                                                                                                                                            | 148021   |
| 4  | or/1-3                                                                                                                                                                                                                     | 291254   |
| 5  | cancerlit.ab.                                                                                                                                                                                                              | 740      |
| 6  | cochrane.ab.                                                                                                                                                                                                               | 79808    |
| 7  | embase.ab.                                                                                                                                                                                                                 | 82418    |
| 8  | (psychlit or psyclit).ab.                                                                                                                                                                                                  | 996      |
| 9  | (psychinfo or psycinfo).ab.                                                                                                                                                                                                | 20842    |
| 10 | (cinahl or cinhal).ab.                                                                                                                                                                                                     | 24293    |
| 11 | science citation index.ab.                                                                                                                                                                                                 | 3312     |
| 12 | bids.ab.                                                                                                                                                                                                                   | 571      |
| 13 | or/5-12                                                                                                                                                                                                                    | 128593   |
| 14 | reference lists.ab.                                                                                                                                                                                                        | 17025    |
| 15 | bibliograph\$.ab.                                                                                                                                                                                                          | 19151    |
| 16 | hand-search\$.ab.                                                                                                                                                                                                          | 7008     |
| 17 | manual search\$.ab.                                                                                                                                                                                                        | 4406     |
| 18 | relevant journals.ab.                                                                                                                                                                                                      | 1313     |
| 19 | or/14-18                                                                                                                                                                                                                   | 43993    |
| 20 | data extraction.ab.                                                                                                                                                                                                        | 19994    |
| 21 | selection criteria.ab.                                                                                                                                                                                                     | 33126    |
| 22 | 20 or 21                                                                                                                                                                                                                   | 50993    |
| 23 | review.pt.                                                                                                                                                                                                                 | 2353244  |
| 24 | 22 and 23                                                                                                                                                                                                                  | 25406    |
| 25 | letter.pt.                                                                                                                                                                                                                 | 1013577  |
| 26 | editorial.pt.                                                                                                                                                                                                              | 562504   |
| 27 | animal/                                                                                                                                                                                                                    | 1840342  |
| 28 | human/                                                                                                                                                                                                                     | 19481735 |
| 29 | 27 not (27 and 28)                                                                                                                                                                                                         | 79485    |
| 30 | or/25-26,29                                                                                                                                                                                                                | 1655532  |
| 31 | 4 or 13 or 19 or 24                                                                                                                                                                                                        | 345681   |
| 32 | 31 not 30                                                                                                                                                                                                                  | 336477   |
| 33 | infant nutrition.tw. or exp infant nutrition/ or nutritional support.tw. or exp nutritional support/ or infant\$food.tw. or infant\$diet.tw. or baby\$food.tw. or baby\$diet.tw. or exp baby food/ or exp artificial milk/ | 101863   |

|    |                                                                                                                                                                                                                                                                                                                                                                                                                                                                                                                                                                                                                                                                                                                                                                                                                                                                                                                         |         |
|----|-------------------------------------------------------------------------------------------------------------------------------------------------------------------------------------------------------------------------------------------------------------------------------------------------------------------------------------------------------------------------------------------------------------------------------------------------------------------------------------------------------------------------------------------------------------------------------------------------------------------------------------------------------------------------------------------------------------------------------------------------------------------------------------------------------------------------------------------------------------------------------------------------------------------------|---------|
| 34 | exp cognition assessment/ or Cognition.tw. or exp cognition/ or exp social cognition/ or IQ.tw. or intelligence.tw. or exp Wechsler adult intelligence scale/ or exp intelligence quotient/ or exp Wechsler intelligence scale/ or exp "Wechsler preschool and primary scale of intelligence"/ or exp intelligence/ or exp Wechsler intelligence scale for children/ or exp intelligence test/ or exp emotional intelligence/ or Intelligence.mp. or exp Stanford-Binet Intelligence Scale/ or (neurodevelopment or cognitive).tw. or child\$development.tw. or exp child development/ or exp neuropsychological test/ or exp child development/ or exp "Bayley Scales of Infant Development"/ or exp mental development/ or bayley.tw. or exp reading/ or exp school/ or exp learning disorder/ or exp educational status/ or exp education/ or exp achievement/ or exp academic achievement/ or school attainment.tw. | 3302096 |
| 35 | (child\$ or infant\$ or baby or babies or adolescent\$ or teenager\$).tw.                                                                                                                                                                                                                                                                                                                                                                                                                                                                                                                                                                                                                                                                                                                                                                                                                                               | 1963467 |
| 36 | palmitate.tw. or exp palmitic acid/ or palmitic acid.tw. or sn-2 palmitate.tw. or triglyceride.tw. or exp triacylglycerol/                                                                                                                                                                                                                                                                                                                                                                                                                                                                                                                                                                                                                                                                                                                                                                                              | 214049  |
| 37 | crossover-procedure/ or double-blind procedure/ or randomized controlled trial/ or single-blind procedure/ or (random* or factorial* or crossover* or cross over* or placebo* or (doubl* adj blind*) or (singl* adj blind*) or assign* or allocat* or volunteer*).tw.                                                                                                                                                                                                                                                                                                                                                                                                                                                                                                                                                                                                                                                   | 1975974 |
| 38 | 32 or 37                                                                                                                                                                                                                                                                                                                                                                                                                                                                                                                                                                                                                                                                                                                                                                                                                                                                                                                | 2180399 |
| 39 | 33 and 34 and 35 and 36 and 38                                                                                                                                                                                                                                                                                                                                                                                                                                                                                                                                                                                                                                                                                                                                                                                                                                                                                          | 13      |

### MEDLINE®

MEDLINE terms for cognitive ability, study population, and infant nutrition (see above) and ...

|                                                                                                                            |
|----------------------------------------------------------------------------------------------------------------------------|
| ("Palmitic Acids"[Mesh] OR "Triglycerides"[Mesh] OR "Beta*palmitate"[TIAB] OR "sn-2 palmitate"[TIAB] OR "Palmitate"[TIAB]) |
|----------------------------------------------------------------------------------------------------------------------------|

### Nucleotides

#### Embase

| #  | Searches                                                                                                                                                                                                                                                              | Results  |
|----|-----------------------------------------------------------------------------------------------------------------------------------------------------------------------------------------------------------------------------------------------------------------------|----------|
| 1  | exp Meta Analysis/                                                                                                                                                                                                                                                    | 144648   |
| 2  | ((meta adj analy\$) or metaanalys\$).tw.                                                                                                                                                                                                                              | 168465   |
| 3  | (systematic adj (review\$1 or overview\$1)).tw.                                                                                                                                                                                                                       | 148021   |
| 4  | or/1-3                                                                                                                                                                                                                                                                | 291254   |
| 5  | cancerlit.ab.                                                                                                                                                                                                                                                         | 740      |
| 6  | cochrane.ab.                                                                                                                                                                                                                                                          | 79808    |
| 7  | embase.ab.                                                                                                                                                                                                                                                            | 82418    |
| 8  | (psychlit or psyclit).ab.                                                                                                                                                                                                                                             | 996      |
| 9  | (psychinfo or psycinfo).ab.                                                                                                                                                                                                                                           | 20842    |
| 10 | (cinahl or cinhal).ab.                                                                                                                                                                                                                                                | 24293    |
| 11 | science citation index.ab.                                                                                                                                                                                                                                            | 3312     |
| 12 | bids.ab.                                                                                                                                                                                                                                                              | 571      |
| 13 | or/5-12                                                                                                                                                                                                                                                               | 128593   |
| 14 | reference lists.ab.                                                                                                                                                                                                                                                   | 17025    |
| 15 | bibliograph\$.ab.                                                                                                                                                                                                                                                     | 19151    |
| 16 | hand-search\$.ab.                                                                                                                                                                                                                                                     | 7008     |
| 17 | manual search\$.ab.                                                                                                                                                                                                                                                   | 4406     |
| 18 | relevant journals.ab.                                                                                                                                                                                                                                                 | 1313     |
| 19 | or/14-18                                                                                                                                                                                                                                                              | 43993    |
| 20 | data extraction.ab.                                                                                                                                                                                                                                                   | 19994    |
| 21 | selection criteria.ab.                                                                                                                                                                                                                                                | 33126    |
| 22 | 20 or 21                                                                                                                                                                                                                                                              | 50993    |
| 23 | review.pt.                                                                                                                                                                                                                                                            | 2353244  |
| 24 | 22 and 23                                                                                                                                                                                                                                                             | 25406    |
| 25 | letter.pt.                                                                                                                                                                                                                                                            | 1013577  |
| 26 | editorial.pt.                                                                                                                                                                                                                                                         | 562504   |
| 27 | animal/                                                                                                                                                                                                                                                               | 1840342  |
| 28 | human/                                                                                                                                                                                                                                                                | 19481735 |
| 29 | 27 not (27 and 28)                                                                                                                                                                                                                                                    | 79485    |
| 30 | or/25-26,29                                                                                                                                                                                                                                                           | 1655532  |
| 31 | 4 or 13 or 19 or 24                                                                                                                                                                                                                                                   | 345681   |
| 32 | 31 not 30                                                                                                                                                                                                                                                             | 336477   |
| 33 | crossover-procedure/ or double-blind procedure/ or randomized controlled trial/ or single-blind procedure/ or (random* or factorial* or crossover* or cross over* or placebo* or (doubl* adj blind*) or (singl* adj blind*) or assign* or allocat* or volunteer*).tw. | 1975974  |
| 34 | 32 or 33                                                                                                                                                                                                                                                              | 2180399  |

|    |                                                                                                                                                                                                                                                                                                                                                                                                                                                                                                                                                                                                                                                                                                                                                                                                                                                                                                                         |         |
|----|-------------------------------------------------------------------------------------------------------------------------------------------------------------------------------------------------------------------------------------------------------------------------------------------------------------------------------------------------------------------------------------------------------------------------------------------------------------------------------------------------------------------------------------------------------------------------------------------------------------------------------------------------------------------------------------------------------------------------------------------------------------------------------------------------------------------------------------------------------------------------------------------------------------------------|---------|
| 35 | exp nucleotide/ or "nucleic acids, nucleic acid components and their derivatives"/                                                                                                                                                                                                                                                                                                                                                                                                                                                                                                                                                                                                                                                                                                                                                                                                                                      | 538970  |
| 36 | dietary nucleotide.m_titl.                                                                                                                                                                                                                                                                                                                                                                                                                                                                                                                                                                                                                                                                                                                                                                                                                                                                                              | 21      |
| 37 | nucleotid\$.tw.                                                                                                                                                                                                                                                                                                                                                                                                                                                                                                                                                                                                                                                                                                                                                                                                                                                                                                         | 324666  |
| 38 | infant nutrition.tw. or exp infant nutrition/ or nutritional support.tw. or exp nutritional support/ or infant\$food.tw. or infant\$diet.tw. or baby\$food.tw. or baby\$diet.tw. or exp baby food/ or exp artificial milk/                                                                                                                                                                                                                                                                                                                                                                                                                                                                                                                                                                                                                                                                                              | 101863  |
| 39 | exp cognition assessment/ or Cognition.tw. or exp cognition/ or exp social cognition/ or IQ.tw. or intelligence.tw. or exp Wechsler adult intelligence scale/ or exp intelligence quotient/ or exp Wechsler intelligence scale/ or exp "Wechsler preschool and primary scale of intelligence"/ or exp intelligence/ or exp Wechsler intelligence scale for children/ or exp intelligence test/ or exp emotional intelligence/ or Intelligence.mp. or exp Stanford-Binet Intelligence Scale/ or (neurodevelopment or cognitive).tw. or child\$development.tw. or exp child development/ or exp neuropsychological test/ or exp child development/ or exp "Bayley Scales of Infant Development"/ or exp mental development/ or bayley.tw. or exp reading/ or exp school/ or exp learning disorder/ or exp educational status/ or exp education/ or exp achievement/ or exp academic achievement/ or school attainment.tw. | 3302096 |
| 40 | 35 or 36 or 37                                                                                                                                                                                                                                                                                                                                                                                                                                                                                                                                                                                                                                                                                                                                                                                                                                                                                                          | 779918  |
| 41 | 34 and 38 and 39 and 40                                                                                                                                                                                                                                                                                                                                                                                                                                                                                                                                                                                                                                                                                                                                                                                                                                                                                                 | 17      |

**MEDLINE®**

MEDLINE terms for cognitive ability, study population, and infant nutrition (see above) and ...

|                                                                           |
|---------------------------------------------------------------------------|
| "Nucleotides"[Mesh] OR "Dietary nucleotides"[TIAB] OR "Nucleotides"[TIAB] |
|---------------------------------------------------------------------------|

## Supplement 2: Power calculations and primary outcomes for the original trials

| Trial   | Primary Outcomes                                                   | Delta / Power                                                                                                                                                                                                                                                                                                                                                                                                                                                                                                                                                                                                                                                                                                                                                                                   |
|---------|--------------------------------------------------------------------|-------------------------------------------------------------------------------------------------------------------------------------------------------------------------------------------------------------------------------------------------------------------------------------------------------------------------------------------------------------------------------------------------------------------------------------------------------------------------------------------------------------------------------------------------------------------------------------------------------------------------------------------------------------------------------------------------------------------------------------------------------------------------------------------------|
| NEP     | Growth and neuro-development at 18 months postterm (Bayley Scales) | The target sample size per randomized group (113 infants) was calculated to permit detection of a 300-g difference in weight between groups at 9 months and a 400-g difference at 18 months (in each case the difference between the 10th and 25th centiles) at 5% significance and 70% to 80% power. This sample size would also permit detection of a 4-point (approximately 0.3 SD) difference in Bayley developmental indices.                                                                                                                                                                                                                                                                                                                                                              |
| NETSGA  | Bayley Scales at 18 months                                         | The primary hypothesis in respect to development was that there would be a one-third SD difference in Bayley MDI and PDI scores at 18 months between the 2 randomized groups. We calculated that, with 144 infants per group, we had 80% power at 5% significance to detect this difference, and a similar one-third SD difference in developmental scores at 9 months.                                                                                                                                                                                                                                                                                                                                                                                                                         |
| LCPUFAP | Bayley Scales at 18 months                                         | The calculated sample size (100 infants per randomized group) permitted detection of a 0.4 standard deviation (SD) difference between diet groups with 80% power at 5% significance. Seventy- five subjects per randomized group (the approximate number seen at 18-month follow-up) would permit detection of a 0.46 SD difference between groups with 80% power at 5% significance.                                                                                                                                                                                                                                                                                                                                                                                                           |
| LCPUFAT | Bayley Scales at 18 months                                         | A five-point difference in the primary outcome, Bayley MDI at 18 months, was judged clinically relevant and was also chosen based on comparative studies of formula-fed infants versus breastfed infants, from which it has been hypothesised that the difference in developmental scores could relate to LCPUFAs in breast milk. With a targeted maximum of 142 individuals in each group, we were 80% likely to detect such a difference at the 5% level of significance (minimum recruitment was set at 111 individuals per group, to detect the hypothesised difference at 70% power). At 18 months, we had developmental data on 125 individuals in each group, in fact yielding over 95% power to detect a five-point difference, given that the actual SD was lower than that estimated. |
| IRONT   | Bayley Scales at 18 months                                         | The study was designed to have 80% power to detect an overall five-point (1/3 SD) difference in Bayley MDI and PDI at 5% significance between (1) the iron fortified follow-on formula and unfortified formula                                                                                                                                                                                                                                                                                                                                                                                                                                                                                                                                                                                  |
| PALMT   | Stool hardness                                                     | Sample size was calculated to detect plausible differences in stool hardness and constipation between the study groups at 5% significance and 80% power. This sample size would enable a plausible 0.365-SD difference in radial BMC between randomly assigned groups to be detected at 5% significance and 80% power.                                                                                                                                                                                                                                                                                                                                                                                                                                                                          |
| NUCLEOT | Diarrheal episodes                                                 | Sample size was initially calculated to detect a 0.5 SD difference in the number of diarrheal episodes between randomized formula-fed groups with 80% power at 5% significance. However, successful recruitment meant that the trial was continued beyond that originally planned to give a power of 0.4 SD difference in outcomes between the randomized groups at 80% power and $P < 0.05$ .                                                                                                                                                                                                                                                                                                                                                                                                  |

### Post-linkage delta estimation for primary outcome

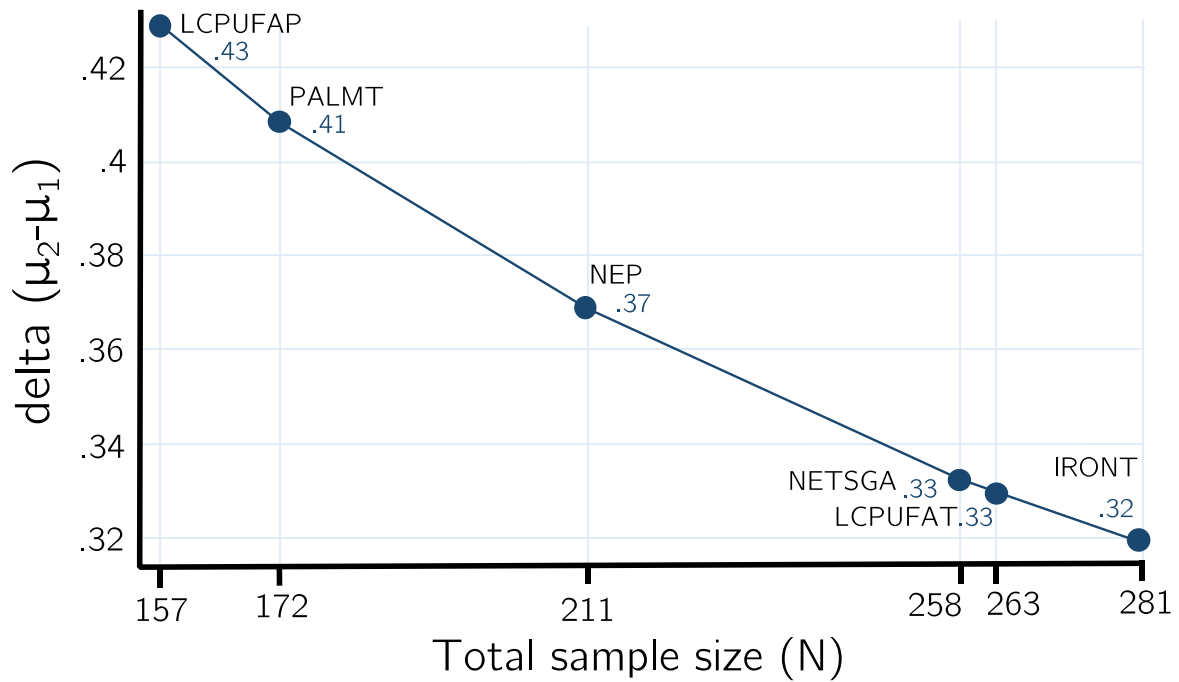

Parameters:

$\alpha = .05$ ,  $\mu_1 = 0$ ,  $\sigma = 0.95$ ,  $1-\beta=0.8$

The total (complete case) number of participants linked to the primary outcome in the NEP, NETSGA, LCPUFAP, LCPUFAT and IRONT trials was 211, 258, 157, 263, and 281 participants respectively. Assuming 80% power ( $1-\beta$ ) and an average of 0.95  $\sigma$  (achieved through covariate adjustment and multiple imputation in the primary analysis) these sample sizes could detect SD differences ( $\delta$ ) that were at least as large as 0.43 (LCPUFAP), 0.37 (NEP), 0.33 (NETSGA), 0.33 (LCPUFAT) and 0.32 SD (IRONT) respectively.

**Supplement 3: Macronutrient compositions of intervention and control formulas in the different trials**

|                                              | <b>NEP</b>       |                  | <b>NETSGA</b>    |                  | <b>LCPUFAP</b>   |                  | <b>LCPUFAT</b>   |                  | <b>IRONT</b>     |                  |
|----------------------------------------------|------------------|------------------|------------------|------------------|------------------|------------------|------------------|------------------|------------------|------------------|
| per 100 ml                                   | Standard formula | Modified formula | Standard formula | Modified formula | Standard formula | Modified formula | Standard formula | Modified formula | Standard formula | Modified formula |
| Energy (kcal)                                | 68               | 72               | 68               | 72               | 70               | 70               | 67               | 67               | 65               | 65               |
| Protein (g)                                  | 1.45             | 1.85             | 1.45             | 1.85             | 2                | 2                | 1.5              | 1.5              | 2.5              | 2.5              |
| Casein                                       | 0.56             | 0.72             | 0.56             | 0.72             | 0.8              | 0.8              | 0.6              | 0.6              | 1                | 1                |
| Whey                                         | 0.89             | 1.13             | 0.89             | 1.13             | 1.2              | 1.2              | 0.9              | 0.9              | 1.5              | 1.5              |
| Carbohydrate (g)                             | 6.96             | 7.24             | 6.96             | 7.24             | 7.7              | 7.7              | 7.6              | 7.7              | 8                | 8                |
| Fat (g)                                      | 3.82             | 3.96             | 3.82             | 3.96             | 3.5              | 3.5              | 3.4              | 3.4              | 2.8              | 2.8              |
| <i>Fatty acid composition (g/ 100 g fat)</i> |                  |                  |                  |                  |                  |                  |                  |                  |                  |                  |
| C10:0 capric                                 |                  |                  |                  |                  | 1.2              | 1.1              | 2.4              | 2                |                  |                  |
| C12:0 lauric                                 |                  |                  |                  |                  | 6.3              | 4.9              | 1.6              | 12.3             |                  |                  |
| C14:0 myristic                               |                  |                  |                  |                  | 5.6              | 5.6              | 8.6              | 5.2              |                  |                  |
| C16:0 palmitic                               |                  |                  |                  |                  | 25.8             | 26.3             | 23.3             | 25.6             |                  |                  |
| C18:0 stearic                                |                  |                  |                  |                  | 8.2              | 8.5              | 10.2             | 4.6              |                  |                  |
| C18:1 oleic                                  |                  |                  |                  |                  | 32.6             | 32.9             | 32.7             | 29.7             |                  |                  |
| C18:2 n-6 linoleic                           |                  |                  |                  |                  | 10.6             | 12               | 12.4             | 15.9             |                  |                  |
| C18:3 n-3 linolenic                          |                  |                  |                  |                  | 0.7              | 0.6              | 1.1              | 1.4              |                  |                  |
| C20:4 n-6 AA                                 |                  |                  |                  |                  | -                | 0.31             | -                | 0.3              |                  |                  |
| C20:5 n-3 eicosapentaenoic                   |                  |                  |                  |                  | -                | 0.04             | -                | 0.01             |                  |                  |
| C22:6 n-3 DHA                                |                  |                  |                  |                  | -                | 0.17             | -                | 0.32             |                  |                  |
| Cholesterol                                  |                  |                  |                  |                  | -                | 7.73             | <0.5             | 0.8              |                  |                  |

Information extracted from the original trial publications.



**Supplement 4: Consistency of school outcomes with previous in-trial measurements. Pearson's correlation between cognitive measures (all trials combined)**

|            | Bayley MDI | IQ age 6 | English 11 | Maths 11 | English 16 | Maths 16 | IQ age 17 | Legend |
|------------|------------|----------|------------|----------|------------|----------|-----------|--------|
| Bayley MDI | 1          |          |            |          |            |          |           | 1      |
| IQ age 6   | 0.3711     | 1        |            |          |            |          |           | 0.8    |
| English 11 | 0.3342     | 0.5296   | 1          |          |            |          |           | 0.4    |
| Maths 11   | 0.2671     | 0.4684   | 0.699      | 1        |            |          |           | 0      |
| English 16 | 0.3012     | 0.5157   | 0.5945     | 0.5692   | 1          |          |           | -0.4   |
| Maths 16   | 0.2672     | 0.491    | 0.607      | 0.7731   | 0.7495     | 1        |           | -0.8   |
| IQ age 17  | 0.0728     | 0.4669   | 0.5664     | 0.7162   | 0.6231     | 0.7533   | 1         | -1     |

**Supplement 5: Robust standard errors used in this study**

The trials showed heteroskedasticity and skewed residuals. While this does not bias regression coefficients, it makes the usual method to calculate standard errors (ordinary least squares, OLS) less efficient and can thereby affect the width of the confidence intervals. To address this issue we applied robust standard errors using Stata's *vce(robust)* option to all analyses for consistency:

$$var_r(\hat{\beta}_{OLS}) = \left(\frac{N}{N-K}\right)(X'X)^{-1} \sum_{i=1}^N (X_i X_i' \hat{\epsilon}_i^2) (X'X)^{-1}$$

**Equation 1:** Sandwich estimator of variance used for calculation of robust standard errors

In the equation above,  $\hat{\beta}_{OLS}$  is the sample estimator, and  $K$  are the cross-products of the variables  $X$  in the original regression equation. This equation describes that robust standard errors allow the variance of residuals to vary across the variables  $X$ . The standard errors are therefore consistent even if the residuals in the regression model do not have constant variance.

### Supplement 6: Baseline characteristics at randomisation, by trial

|                                          | NEP                |                    | NETSGA              |                     | LCPUFAP            |                    | LCPUFAT             |                     | IRONT               |                     |
|------------------------------------------|--------------------|--------------------|---------------------|---------------------|--------------------|--------------------|---------------------|---------------------|---------------------|---------------------|
|                                          | Modified           | Modified           | Standard            | Modified            |                    |                    | Standard            | Modified            | Modified            | Standard            |
| Randomised, n                            | 113                | 116                | 152                 | 147                 | 96                 | 100                | 155                 | 154                 | 162                 | 165                 |
| Average birth weight, min max (grams)    | 1378<br>(775-2160) | 1359<br>(630-2020) | 2532<br>(1400-3160) | 2602<br>(1770-3160) | 1329<br>(640-1850) | 1352<br>(740-1800) | 3648<br>(2950-4900) | 3540<br>(2680-4930) | 3493<br>(2495-5103) | 3465<br>(2466-4706) |
| Average gestational age, min max (weeks) | 30.7 (26-36)       | 30.8 (25-36)       | 39.0 (37-42)        | 39.4 (37-42)        | 30.3 (24-36)       | 30.3 (25-36)       | 40.1 (37-42)        | 40.0 (37-42)        | 39.8 (36-43)        | 39.9 (35-43)        |
| Mother's age (years)                     | 28.2 (16-41)       | 28.5 (17-44)       | 26.8 (15-42)        | 26.4 (14-42)        | 26.1 (16-39)       | 26.7 (17-39)       | 27.5 (17-44)        | 27.0 (18-41)        | 27.7 (17-40)        | 27.5 (15-39)        |
| Infant sex                               |                    |                    |                     |                     |                    |                    |                     |                     |                     |                     |
| Male, n (%)                              | 53 (47%)           | 57 (50%)           | 74 (49%)            | 68 (46%)            | 42 (44%)           | 53 (53%)           | 82 (53%)            | 83 (54%)            | 82 (51%)            | 81 (49%)            |
| Female, n (%)                            | 60 (53%)           | 58 (50%)           | 78 (51%)            | 79 (54%)            | 54 (56%)           | 47 (47%)           | 73 (47%)            | 71 (46%)            | 79 (49%)            | 84 (51%)            |
| Mother smoked during pregnancy           |                    |                    |                     |                     |                    |                    |                     |                     |                     |                     |
| No, n (%)                                | 67 (61%)           | 74 (68%)           | 79 (55%)            | 67 (50%)            | 55 (57%)           | 60 (60%)           | 117 (77%)           | 110 (74%)           | 116 (73%)           | 111 (69%)           |
| Yes, n (%)                               | 42 (39%)           | 36 (32%)           | 64 (45%)            | 66 (50%)            | 41 (43%)           | 40 (40%)           | 35 (23%)            | 39 (26%)            | 44 (27%)            | 51 (31%)            |
| Missing                                  | 4                  | 6                  | 9                   | 14                  | 0                  | 0                  | 3                   | 5                   | 2                   | 3                   |
| Mother has degree                        |                    |                    |                     |                     |                    |                    |                     |                     |                     |                     |
| No, n (%)                                | 106 (94%)          | 97 (88%)           | 143 (94%)           | 139 (96%)           | 52 (91%)           | 47 (90%)           | 140 (92%)           | 145 (96%)           | 140 (88%)           | 147 (90%)           |
| Yes, n (%)                               | 7 (6%)             | 13 (12%)           | 9 (6%)              | 6 (4%)              | 5 (9%)             | 5 (10%)            | 13 (8%)             | 6 (4%)              | 20 (12%)            | 16 (10%)            |
| Missing                                  | 0                  | 6                  | 0                   | 2                   | 39                 | 48                 | 2                   | 3                   | 2                   | 2                   |

|                                          | PALMT            |                  | NUCLEOT          |                  |
|------------------------------------------|------------------|------------------|------------------|------------------|
|                                          | Modified         | Modified         | Standard         | Modified         |
| Randomised, n                            | 103              | 100              | 100              | 100              |
| Average birth weight, min max (grams)    | 3575 (2640-4730) | 3479 (2520-5400) | 3455 (2210-4830) | 3459 (2170-5360) |
| Average gestational age, min max (weeks) | 40 (37-42)       | 39.9 (37-42)     | 39.4 (37-42)     | 39.2 (37-42)     |
| Mother's age (years)                     | 26.6 (15-40)     | 27.8 (17-42)     | 27 (16-44)       | 27 (16-40)       |
| Infant sex                               |                  |                  |                  |                  |
| Male, n (%)                              | 66 (64%)         | 52 (52%)         | 56 (56%)         | 61 (61%)         |
| Female, n (%)                            | 37 (36%)         | 48 (48%)         | 44 (44%)         | 39 (39%)         |
| Mother smoked during pregnancy           |                  |                  |                  |                  |
| No, n (%)                                | 65 (63%)         | 74 (74%)         | 70 (71%)         | 58 (60%)         |
| Yes, n (%)                               | 38 (37%)         | 26 (26%)         | 28 (29%)         | 38 (40%)         |
| Missing                                  | 0                | 0                | 1                | 1                |
| Mother has degree                        |                  |                  |                  |                  |
| No, n (%)                                | *                | *                | 92 (92%)         | 92 (92%)         |
| Yes, n (%)                               | *                | *                | 8 (8%)           | 8 (8%)           |
| Missing                                  | 76               | 70               | 0                | 0                |

\* Suppressed due to small cell sizes.

**Supplement 7: Primary, Secondary and Sensitivity analyses**

**Primary analysis and sensitivity analyses of the primary outcome in the NEP trial showing mean and standard deviation of within-trial standardised GCSE Maths grade in the nutrient enriched and standard formula group and their mean differences with 95% confidence interval**

| NEP                                                                 | Nutrient enriched formula group |      | Standard term formula group |      | Mean difference | 95% CI      |
|---------------------------------------------------------------------|---------------------------------|------|-----------------------------|------|-----------------|-------------|
| Primary outcome: within-trial standardised GCSE Maths grade         | Mean                            | SD   | Mean                        | SD   |                 |             |
| <b>Primary analysis</b>                                             |                                 |      |                             |      |                 |             |
| MI adjusted (N <sub>E</sub> =112, N <sub>S</sub> =115)              | 0.01                            | 0.95 | -0.01                       | 0.92 | 0.02            | -0.22, 0.27 |
| <b>Sensitivity analyses</b>                                         |                                 |      |                             |      |                 |             |
| MI unadjusted (N <sub>E</sub> =112, N <sub>S</sub> =115)            | 0.00                            | 1.03 | 0.00                        | 0.98 | -0.01           | -0.27, 0.25 |
| Complete-case adjusted (N <sub>E</sub> =98, N <sub>S</sub> =100)    | 0.06                            | 0.94 | -0.03                       | 0.89 | 0.09            | -0.16, 0.35 |
| Complete-case unadjusted (N <sub>E</sub> =101, N <sub>S</sub> =110) | -0.01                           | 1.04 | 0.01                        | 0.97 | -0.02           | -0.29, 0.26 |
| MI adjusted national SD (N <sub>E</sub> =112, N <sub>S</sub> =115)  | -0.42                           | 0.99 | -0.44                       | 0.96 | 0.03            | -0.23, 0.28 |

*Footnotes: GCSE General Certificate of Secondary Education; MI multiple imputation of covariates and outcomes; NEP nutrient enriched preterm post-discharge trial; N<sub>E</sub> Number of participants in the enriched formula group; N<sub>S</sub> Number of participants in the standard formula group; SD standard deviation; adjusted for: infant sex, birth weight, gestational age, recruitment centre, maternal smoking during pregnancy, and maternal education at birth.*

**Primary analysis and sensitivity analyses of the primary outcome in the NETSGA trial showing mean and standard deviation of within-trial standardised GCSE Maths grade in the nutrient enriched and standard term formula group and their mean differences with 95% confidence interval**

| NETSGA                                                              | Nutrient enriched formula group |      | Standard term formula group |      | Mean difference | 95% CI      |
|---------------------------------------------------------------------|---------------------------------|------|-----------------------------|------|-----------------|-------------|
| Primary outcome: within-trial standardised GCSE Maths grade         | Mean                            | SD   | Mean                        | SD   |                 |             |
| <b>Primary analysis</b>                                             |                                 |      |                             |      |                 |             |
| MI adjusted (N <sub>E</sub> =152, N <sub>S</sub> =147)              | -0.05                           | 0.97 | 0.05                        | 0.99 | -0.11           | -0.33, 0.12 |
| <b>Sensitivity analyses</b>                                         |                                 |      |                             |      |                 |             |
| MI unadjusted (N <sub>E</sub> =152, N <sub>S</sub> =147)            | -0.02                           | 1.00 | 0.02                        | 1.00 | 0.04            | -0.27, 0.19 |
| Complete-case adjusted (N <sub>E</sub> =122, N <sub>S</sub> =114)   | -0.10                           | 1.00 | 0.09                        | 1.05 | -0.19           | -0.46, 0.08 |
| Complete-case unadjusted (N <sub>E</sub> =130, N <sub>S</sub> =128) | -0.03                           | 1.01 | 0.03                        | 0.99 | -0.07           | -0.31, 0.18 |
| MI adjusted national (N <sub>E</sub> =152, N <sub>S</sub> =147)     | -0.46                           | 0.93 | -0.36                       | 0.95 | -0.10           | -0.32, 0.12 |

*Footnotes: GCSE General Certificate of Secondary Education; MI multiple imputation of covariates and outcomes; NETSGA nutrient enriched term small-for-gestational-age trial; N<sub>E</sub> Number of participants in the enriched formula group; N<sub>S</sub> Number of participants in the standard formula group; SD standard deviation; adjusted for: infant sex, birth weight, gestational age, recruitment centre, maternal smoking during pregnancy, and maternal education at birth.*

**Primary analysis and sensitivity analyses of the primary outcome in the LCPUFAP trial showing mean and standard deviation of within-trial standardised GCSE Maths grade in the LCPUFA preterm and standard preterm formula group and their mean differences with 95% confidence interval**

| LCPUFAP                                                              | LCPUFA formula<br>(0.17% DHA and<br>0.31% AA<br>/ total fat) |      | Standard preterm<br>formula group (no<br>DHA or AA) |      |                    |             |
|----------------------------------------------------------------------|--------------------------------------------------------------|------|-----------------------------------------------------|------|--------------------|-------------|
| Primary outcome:<br>within-trial standardised GCSE Maths<br>grade    | Mean                                                         | SD   | Mean                                                | SD   | Mean<br>difference | 95% CI      |
| Primary analysis                                                     |                                                              |      |                                                     |      |                    |             |
| MI adjusted<br>(N <sub>L</sub> =92, N <sub>S</sub> =100)             | -0.10                                                        | 0.89 | 0.09                                                | 0.97 | -0.19              | -0.46, 0.08 |
| Sensitivity analyses                                                 |                                                              |      |                                                     |      |                    |             |
| MI unadjusted<br>(N <sub>L</sub> =92, N <sub>S</sub> =100)           | -0.10                                                        | 0.97 | 0.10                                                | 1.03 | -0.20              | -0.48, 0.09 |
| Complete-case adjusted<br>(N <sub>L</sub> =48, N <sub>S</sub> =44)   | -0.02                                                        | 0.92 | 0.20                                                | 1.00 | -0.22              | -0.62, 0.19 |
| Complete-case unadjusted<br>(N <sub>L</sub> =74, N <sub>S</sub> =83) | -0.09                                                        | 0.97 | -0.08                                               | 1.03 | -0.17              | -0.49, 0.14 |
| MI adjusted national SD<br>(N <sub>L</sub> =92, N <sub>S</sub> =100) | -0.75                                                        | 0.93 | -0.55                                               | 1.02 | -0.20              | -0.48, 0.09 |

*Footnotes:* GCSE General Certificate of Secondary Education; MI multiple imputation of covariates and outcomes; LCPUFAP long-chain polyunsaturated fatty acid supplemented formula for preterm babies trial; N<sub>L</sub> Number of participants in the LCPUFA formula group; N<sub>S</sub> Number of participants in the standard formula group; SD standard deviation; adjusted for: infant sex, birth weight, gestational age, recruitment centre, maternal smoking during pregnancy, and maternal education at birth.

**Primary analysis and sensitivity analyses of the primary outcome in the LCPUFAT trial showing mean and standard deviation of within-trial standardised GCSE Maths grade in the LCPUFA and standard formula group and their mean differences with 95% confidence interval**

| LCPUFAT                                                                | LCPUFA formula<br>(0.32% DHA and<br>0.30% AA /total<br>fat) |      | Standard term<br>formula<br>(no DHA or AA) |      |                    |             |
|------------------------------------------------------------------------|-------------------------------------------------------------|------|--------------------------------------------|------|--------------------|-------------|
| Primary outcome:<br>within-trial standardised GCSE Maths<br>grade      | Mean                                                        | SD   | Mean                                       | SD   | Mean<br>difference | 95% CI      |
| Primary analysis                                                       |                                                             |      |                                            |      |                    |             |
| MI adjusted<br>(N <sub>L</sub> =155, N <sub>S</sub> =154)              | -0.07                                                       | 0.97 | 0.07                                       | 0.97 | -0.14              | -0.36, 0.08 |
| Sensitivity analyses                                                   |                                                             |      |                                            |      |                    |             |
| MI unadjusted<br>(N <sub>L</sub> =155, N <sub>S</sub> =154)            | -0.04                                                       | 1.02 | 0.04                                       | 0.99 | -0.07              | -0.30, 0.15 |
| Complete-case adjusted<br>(N <sub>L</sub> =122 N <sub>S</sub> =130)    | -0.02                                                       | 0.96 | 0.07                                       | 0.98 | -0.09              | -0.33, 0.16 |
| Complete-case unadjusted<br>(N <sub>L</sub> =127, N <sub>S</sub> =136) | -0.02                                                       | 1.01 | 0.02                                       | 0.99 | -0.04              | -0.28, 0.21 |
| MI adjusted national SD<br>(N <sub>L</sub> =155, N <sub>S</sub> =154)  | -0.36                                                       | 0.85 | -0.23                                      | 0.84 | -0.12              | -0.31, 0.07 |

*Footnotes:* GCSE General Certificate of Secondary Education; MI multiple imputation of covariates and outcomes; LCPUFAT long-chain polyunsaturated fatty acid supplemented formula for term babies trial; N<sub>L</sub> Number of participants in the LCPUFA formula group; N<sub>S</sub> Number of participants in the standard formula group; SD standard deviation; adjusted for: infant sex, birth weight, gestational age, recruitment centre, maternal smoking during pregnancy, and maternal education at birth.

**Primary analysis and sensitivity analyses of the primary outcome in the IRONT trial showing mean and standard deviation of within-trial standardised GCSE Maths grade in the high-iron and low-iron formula group and their mean differences with 95% confidence interval**

| IRONT                                                                 | High iron (12mg/dl) formula |      | Low iron (0.9mg/dl) formula |      | Mean difference | 95% CI      |
|-----------------------------------------------------------------------|-----------------------------|------|-----------------------------|------|-----------------|-------------|
|                                                                       | Mean                        | SD   | Mean                        | SD   |                 |             |
| Primary outcome: within-trial standardised GCSE Maths grade           |                             |      |                             |      |                 |             |
| Primary analysis                                                      |                             |      |                             |      |                 |             |
| MI adjusted (N <sub>HI</sub> =162, N <sub>LI</sub> =165)              | -0.06                       | 0.95 | 0.06                        | 0.83 | -0.12           | -0.31, 0.07 |
| Sensitivity analyses                                                  |                             |      |                             |      |                 |             |
| MI unadjusted (N <sub>HI</sub> =162, N <sub>LI</sub> =165)            | -0.05                       | 1.07 | 0.05                        | 0.93 | -0.10           | -0.44, 0.00 |
| Complete-case adjusted (N <sub>HI</sub> =137, N <sub>LI</sub> =140)   | -0.05                       | 0.98 | 0.04                        | 0.86 | -0.09           | -0.31, 0.13 |
| Complete-case unadjusted (N <sub>HI</sub> =138, N <sub>LI</sub> =143) | -0.02                       | 1.06 | 0.02                        | 0.94 | -0.05           | -0.28, 0.19 |
| MI adjusted national SD (N <sub>HI</sub> =162, N <sub>LI</sub> =165)  | -0.19                       | 0.89 | -0.07                       | 0.78 | -0.12           | -0.30, 0.07 |

*Footnotes:* GCSE General Certificate of Secondary Education; MI multiple imputation of covariates and outcomes; IRONT iron trial; N<sub>HI</sub> Number of participants in the high iron formula group; N<sub>LI</sub> Number of participants in the low-iron formula group; SD standard deviation; adjusted for: infant sex, birth weight, gestational age, recruitment centre, maternal smoking during pregnancy, and maternal education at birth.

**Primary analysis and sensitivity analyses of the primary outcome in the PALMT trial showing mean and standard deviation of within-trial standardised GCSE Maths grade in the 50% sn-2 palmitate and 12% sn-2 palmitate formula group and their mean differences with 95% confidence interval**

| PALMT                                                              | Sn-2 palmitate formula |      | Standard palmitate formula |      | Standardised mean difference | 95% CI      |
|--------------------------------------------------------------------|------------------------|------|----------------------------|------|------------------------------|-------------|
|                                                                    | Mean SD-score          | SD   | Mean SD-score              | SD   |                              |             |
| Primary outcome: within-trial standardised GCSE Maths grade        |                        |      |                            |      |                              |             |
| Primary analysis                                                   |                        |      |                            |      |                              |             |
| MI adjusted (N <sub>P</sub> =103, N <sub>S</sub> =100)             | -0.04                  | 1.03 | 0.05                       | 0.96 | -0.09                        | -0.37, 0.19 |
| Sensitivity analyses                                               |                        |      |                            |      |                              |             |
| MI unadjusted (N <sub>P</sub> =103, N <sub>S</sub> =100)           | -0.07                  | 1.04 | 0.07                       | 0.96 | -0.14                        | -0.41, 0.14 |
| Complete-case adjusted (N <sub>P</sub> =27, N <sub>S</sub> =27)    | 0.21                   | 1.05 | 0.36                       | 0.81 | -0.16                        | -0.71, 0.39 |
| Complete-case unadjusted (N <sub>P</sub> =91, N <sub>S</sub> =81)  | -0.05                  | 1.03 | 0.05                       | 0.96 | -0.10                        | -0.40, 0.20 |
| MI adjusted national SD (N <sub>P</sub> =103, N <sub>S</sub> =100) | -0.27                  | 1.06 | 0.18                       | 0.98 | -0.09                        | -0.37, 0.19 |

*Footnotes:* GCSE General Certificate of Secondary Education; MI multiple imputation of covariates and outcomes; PALM Sn-2 Palmitate trial; N<sub>P</sub> Number of participants in the sn-2 palmitate formula group; N<sub>S</sub> Number of participants in the standard palmitate formula group; SD standard deviation; adjusted for: infant sex, birth weight, gestational age, recruitment centre, maternal smoking during pregnancy, and maternal education at birth; National reference distribution: UK GCSE Maths grades and SD pooled for 2008/09 to 2011/12.

The English national average and standard deviation during the respective year was derived with data from: <https://www.gov.uk/government/collections/statistics-gcses-key-stage-4>

**Secondary outcomes in the NEP trial showing mean differences in modified vs standard formula of GCSE English language exam as within-trial SD-scores, of Maths and English reading exams as within-trial SD-scores at age 11 years (KS2, final year of primary school) and odds ratios in modified vs standard formula of receiving five or more GCSE grades A\* to C (including Maths and English) and of ever being eligible for special educational needs (SEN) support**

| NEP<br>N <sub>I</sub> =112, N <sub>C</sub> =115 | Nutrient enriched formula |      | Standard formula |      |                 |             |
|-------------------------------------------------|---------------------------|------|------------------|------|-----------------|-------------|
|                                                 | Mean                      | SD   | Mean             | SD   | Mean difference | 95% CI      |
| Within-trial standardised grades:               |                           |      |                  |      |                 |             |
| GCSE English (age 16)                           | 0.00                      | 0.87 | 0.00             | 0.90 | 0.00            | -0.23, 0.23 |
| KS2 Maths (age 11)                              | 0.01                      | 0.96 | -0.01            | 0.92 | 0.02            | -0.22, 0.27 |
| KS2 English (age 11)                            | -0.05                     | 0.91 | 0.05             | 0.93 | -0.09           | -0.33, 0.15 |
| Other secondary outcomes:                       |                           |      |                  |      | Odds ratio      | 95% CI      |
| Ever qualified for special educational needs    |                           |      |                  |      | 1.29            | 0.72, 2.32  |
| 5+ GCSE grades $\geq$ C                         |                           |      |                  |      | 1.27            | 0.70, 2.29  |

*Footnotes:* GCSE General Certificate of Secondary Education; NEP nutrient enriched preterm post-discharge trial; N<sub>E</sub> Number of participants in the enriched formula group; N<sub>S</sub> Number of participants in the standard formula group; SD standard deviation; adjusted for: infant sex, birth weight, gestational age, recruitment centre, maternal smoking during pregnancy, and maternal education at birth; covariates and outcomes imputed for missing participants who have not died.

**Secondary outcomes in the NETSGA trial showing mean differences in modified vs standard formula of GCSE English language exam as within-trial SD-scores, of Maths and English reading exams as within-trial SD-scores at age 11 years (KS2, final year of primary school) and odds ratios in modified vs standard formula of receiving five or more GCSE grades A\* to C (including Maths and English) and of ever being eligible for special educational needs (SEN) support**

| NETSGA<br>N <sub>I</sub> =152, N <sub>C</sub> =147 | Nutrient enriched |      | Standard formula |      |                 |             |
|----------------------------------------------------|-------------------|------|------------------|------|-----------------|-------------|
|                                                    | Mean              | SD   | Mean             | SD   | Mean difference | 95% CI      |
| Within-trial standardised grades:                  |                   |      |                  |      |                 |             |
| GCSE English (age 16)                              | -0.06             | 0.97 | 0.06             | 0.94 | -0.12           | -0.34, 0.10 |
| KS2 Maths (age 11)                                 | -0.09             | 1.01 | 0.09             | 0.98 | -0.18           | -0.41, 0.05 |
| KS2 English (age 11)                               | -0.10             | 0.98 | 0.10             | 1.01 | -0.20           | -0.43, 0.03 |
| Other secondary outcomes:                          |                   |      |                  |      | Odds ratio      | 95% CI      |
| Ever qualified for special educational needs       |                   |      |                  |      | 1.49            | 0.90, 2.47  |
| 5+ GCSE grades $\geq$ C                            |                   |      |                  |      | 1.00            | 0.60, 1.71  |

*Footnotes:* GCSE General Certificate of Secondary Education; NETSGA nutrient enriched term small-for-gestational-age trial; N<sub>E</sub> Number of participants in the enriched formula group; N<sub>S</sub> Number of participants in the standard formula group; SD standard deviation; adjusted for: infant sex, birth weight, gestational age, recruitment centre, maternal smoking during pregnancy, and maternal education at birth; covariates and outcomes imputed for missing participants who have not died.

**Secondary outcomes in the LCPUFAP trial showing mean differences in modified vs standard formula of GCSE English language exam as within-trial SD-scores, of Maths and English reading exams as within-trial SD-scores at age 11 years (KS2, final year of primary school) and odds ratios in modified vs standard formula of receiving five or more GCSE grades A\* to C (including Maths and English) and of ever being eligible for special educational needs (SEN) support**

| LCPUFAP<br>N <sub>I</sub> =92, N <sub>C</sub> =100 | LCPUFA formula (0.17% DHA and 0.31% AA/total fat) |      | Standard preterm formula (no DHA or AA) |      |                 |              |
|----------------------------------------------------|---------------------------------------------------|------|-----------------------------------------|------|-----------------|--------------|
|                                                    | Mean                                              | SD   | Mean                                    | SD   | Mean difference | 95% CI       |
| Within-trial standardised grades:                  |                                                   |      |                                         |      |                 |              |
| GCSE English (age 16)                              | -0.11                                             | 0.88 | 0.10                                    | 0.93 | -0.21           | -0.48, 0.06  |
| KS2 Maths (age 11)                                 | -0.19                                             | 0.92 | 0.18                                    | 0.96 | -0.37           | -0.64, -0.09 |
| KS2 English (age 11)                               | -0.15                                             | 0.96 | 0.14                                    | 0.91 | -0.29           | -0.56, -0.01 |
| Other secondary outcomes:                          |                                                   |      |                                         |      | Odds ratio      | 95% CI       |
| Ever qualified for special educational needs       |                                                   |      |                                         |      | 1.34            | 0.68, 2.64   |
| 5+ GCSE grades $\geq$ C                            |                                                   |      |                                         |      | 0.65            | 0.32, 1.31   |

*Footnotes:* GCSE General Certificate of Secondary Education; LCPUFAP long-chain polyunsaturated fatty acid supplemented formula for preterm babies trial; N<sub>L</sub> Number of participants in the LCPUFA formula group; N<sub>S</sub> Number of participants in the standard formula group; SD standard deviation; adjusted for: infant sex, birth weight, gestational age, recruitment centre, maternal smoking during pregnancy, and maternal education at birth; covariates and outcomes imputed for missing participants who have not died.

**Secondary outcomes in the LCPUFAT trial showing mean differences in modified vs standard formula of GCSE English language exam as within-trial SD-scores, of Maths and English reading exams as within-trial SD-scores at age 11 years (KS2, final year of primary school) and odds ratios in modified vs standard formula of receiving five or more GCSE grades A\* to C (including Maths and English) and of ever being eligible for special educational needs (SEN) support**

| LCPUFAT<br>N <sub>I</sub> =155, N <sub>C</sub> =154 | LCPUFA<br>formula<br>(0.17% DHA and<br>0.31% AA/ total<br>fat) |      |      |      | Standard preterm<br>formula (no<br>DHA or AA) |              |
|-----------------------------------------------------|----------------------------------------------------------------|------|------|------|-----------------------------------------------|--------------|
| Within-trial standardised grades:                   | Mean                                                           | SD   | Mean | SD   | Mean<br>difference                            | 95% CI       |
| GCSE English (age 16)                               | -0.06                                                          | 0.97 | 0.06 | 0.94 | -0.13                                         | -0.35, 0.09  |
| KS2 Maths (age 11)                                  | -0.15                                                          | 0.99 | 0.15 | 0.93 | -0.29                                         | -0.51, -0.08 |
| KS2 English (age 11)                                | -0.16                                                          | 0.93 | 0.16 | 0.93 | -0.33                                         | -0.53, -0.11 |
| Other secondary outcomes:                           |                                                                |      |      |      | Odds ratio                                    | 95% CI       |
| Ever qualified for special educational needs        |                                                                |      |      |      | 1.29                                          | 0.78, 2.14   |
| 5+ GCSE grades $\geq$ C                             |                                                                |      |      |      | 0.69                                          | 0.41, 1.16   |

*Footnotes:* GCSE General Certificate of Secondary Education; LCPUFAT long-chain polyunsaturated fatty acid supplemented formula for term babies trial; N<sub>I</sub> Number of participants in the LCPUFA formula group; N<sub>S</sub> Number of participants in the standard formula group; SD standard deviation; adjusted for: infant sex, birth weight, gestational age, recruitment centre, maternal smoking during pregnancy, and maternal education at birth; covariates and outcomes imputed for missing participants who have not died.

**Secondary outcomes in the NETSGA trial showing mean differences in modified vs standard formula of GCSE English language exam as IRONT trial SD-scores, of Maths and English reading exams as within-trial SD-scores at age 11 years (KS2, final year of primary school) and odds ratios in modified vs standard formula of receiving five or more GCSE grades A\* to C (including Maths and English) and of ever being eligible for special educational needs (SEN) support**

| IRONT<br>N <sub>I</sub> =162, N <sub>C</sub> =165 | High iron<br>(12mg/dl)<br>formula |      | Low iron<br>(0.9mg/dl)<br>formula |      |                    |             |
|---------------------------------------------------|-----------------------------------|------|-----------------------------------|------|--------------------|-------------|
| Within-trial standardised grades:                 | Mean                              | SD   | Mean                              | SD   | Mean<br>difference | 95% CI      |
| GCSE English (age 16)                             | -0.08                             | 0.81 | 0.07                              | 0.85 | -0.15              | -0.33, 0.03 |
| KS2 Maths (age 11)                                | -0.04                             | 0.94 | 0.04                              | 0.92 | -0.08              | -0.29, 0.12 |
| KS2 English (age 11)                              | 0.01                              | 0.93 | -0.01                             | 0.90 | 0.02               | -0.18, 0.22 |
| Other secondary outcomes:                         |                                   |      |                                   |      | Odds ratio         | 95% CI      |
| Ever qualified for special educational needs      |                                   |      |                                   |      | 1.32               | 0.80, 2.18  |
| 5+ GCSE grades $\geq$ C                           |                                   |      |                                   |      | 1.30               | 0.67, 2.52  |

*Footnotes:* GCSE General Certificate of Secondary Education; IRONT iron trial; N<sub>HI</sub> Number of participants in the high iron formula group; N<sub>LI</sub> Number of participants in the low-iron formula group; SD standard deviation; adjusted for: infant sex, birth weight, gestational age, recruitment centre, maternal smoking during pregnancy, and maternal education at birth; covariates and outcomes imputed for missing participants who have not died.

**Secondary outcomes in the NETSGA trial showing mean differences in modified vs standard formula of GCSE English language exam as IRONT trial SD-scores, of Maths and English reading exams as within-trial SD-scores at age 11 years (KS2, final year of primary school) and odds ratios in modified vs standard formula of receiving five or more GCSE grades A\* to C (including Maths and English) and of ever being eligible for special educational needs (SEN) support**

| IRONT<br>N <sub>I</sub> =162, N <sub>C</sub> =165 | High iron<br>(12mg/dl)<br>formula |      | Low iron<br>(0.9mg/dl)<br>formula |      |                    |             |
|---------------------------------------------------|-----------------------------------|------|-----------------------------------|------|--------------------|-------------|
| Within-trial standardised grades:                 | Mean                              | SD   | Mean                              | SD   | Mean<br>difference | 95% CI      |
| GCSE English (age 16)                             | -0.08                             | 0.81 | 0.07                              | 0.85 | -0.15              | -0.33, 0.03 |
| KS2 Maths (age 11)                                | -0.04                             | 0.94 | 0.04                              | 0.92 | -0.08              | -0.29, 0.12 |
| KS2 English (age 11)                              | 0.01                              | 0.93 | -0.01                             | 0.90 | 0.02               | -0.18, 0.22 |
| Other secondary outcomes:                         |                                   |      |                                   |      | Odds ratio         | 95% CI      |
| Ever qualified for special educational needs      |                                   |      |                                   |      | 1.32               | 0.80, 2.18  |
| 5+ GCSE grades $\geq$ C                           |                                   |      |                                   |      | 1.30               | 0.67, 2.52  |

*Footnotes:* GCSE General Certificate of Secondary Education; IRONT iron trial; N<sub>HI</sub> Number of participants in the high iron formula group; N<sub>LI</sub> Number of participants in the low-iron formula group; SD standard deviation; adjusted for: infant sex,

birth weight, gestational age, recruitment centre, maternal smoking during pregnancy, and maternal education at birth; covariates and outcomes imputed for missing participants who have not died.

**Secondary outcomes in the NETSGA trial showing mean differences in modified vs standard formula of GCSE English language exam as IRONT trial SD-scores, of Maths and English reading exams as within-trial SD-scores at age 11 years (KS2, final year of primary school) and odds ratios in modified vs standard formula of receiving five or more GCSE grades A\* to C (including Maths and English) and of ever being eligible for special educational needs (SEN) support**

| IRONT<br>N <sub>I</sub> =162, N <sub>C</sub> =165 | High iron<br>(12mg/dl)<br>formula |      | Low iron<br>(0.9mg/dl)<br>formula |      |                 |             |
|---------------------------------------------------|-----------------------------------|------|-----------------------------------|------|-----------------|-------------|
|                                                   | Mean                              | SD   | Mean                              | SD   | Mean difference | 95% CI      |
| Within-trial standardised grades:                 |                                   |      |                                   |      |                 |             |
| GCSE English (age 16)                             | -0.08                             | 0.81 | 0.07                              | 0.85 | -0.15           | -0.33, 0.03 |
| KS2 Maths (age 11)                                | -0.04                             | 0.94 | 0.04                              | 0.92 | -0.08           | -0.29, 0.12 |
| KS2 English (age 11)                              | 0.01                              | 0.93 | -0.01                             | 0.90 | 0.02            | -0.18, 0.22 |
| Other secondary outcomes:                         |                                   |      |                                   |      | Odds ratio      | 95% CI      |
| Ever qualified for special educational needs      |                                   |      |                                   |      | 1.32            | 0.80, 2.18  |
| 5+ GCSE grades $\geq$ C                           |                                   |      |                                   |      | 1.30            | 0.67, 2.52  |

*Footnotes:* GCSE General Certificate of Secondary Education; IRONT iron trial; N<sub>HI</sub> Number of participants in the high iron formula group; N<sub>LI</sub> Number of participants in the low-iron formula group; SD standard deviation; adjusted for: infant sex, birth weight, gestational age, recruitment centre, maternal smoking during pregnancy, and maternal education at birth; covariates and outcomes imputed for missing participants who have not died.

**Secondary outcomes in the PALMT trial showing mean differences in modified vs standard formula of GCSE English language exam as PALMT trial SD-scores, of Maths and English reading exams as within-trial SD-scores at age 11 years (KS2, final year of primary school) and odds ratios in modified vs standard formula of receiving five or more GCSE grades A\* to C (including Maths and English) and of ever being eligible for special educational needs (SEN) support**

| PALMT<br>N <sub>I</sub> =103, N <sub>C</sub> =100 | Sn-2 palmitate<br>formula |      | Standard<br>palmitate<br>formula |      |            |             |
|---------------------------------------------------|---------------------------|------|----------------------------------|------|------------|-------------|
|                                                   | Mean                      | SD   | Mean                             | SD   | SMD        | 95% CI      |
| Within-trial standardised grades:                 |                           |      |                                  |      |            |             |
| GCSE English (age 16)                             | -0.03                     | 0.95 | 0.03                             | 0.93 | -0.06      | -0.33, 0.21 |
| KS2 Maths (age 11)                                | -0.02                     | 1.00 | 0.02                             | 0.99 | -0.03      | -0.32, 0.25 |
| KS2 English (age 11)                              | 0.08                      | 0.95 | -0.08                            | 1.03 | 0.15       | -0.13, 0.43 |
| Other secondary outcomes:                         |                           |      |                                  |      | Odds ratio | 95% CI      |
| Ever qualified for special educational needs      |                           |      |                                  |      | 0.81       | 0.42, 1.53  |
| 5+ GCSE grades $\geq$ C                           |                           |      |                                  |      | 1.30       | 0.67, 2.52  |

*Footnotes:* GCSE General Certificate of Secondary Education; PALM Sn-2 Palmitate trial; N<sub>P</sub> Number of participants in the sn-2 palmitate formula group; N<sub>S</sub> Number of participants in the standard palmitate formula group; SD standard deviation; SMD standardised mean difference; adjusted for: infant sex, birth weight, gestational age, recruitment centre, maternal smoking during pregnancy, and maternal education at birth; covariates and outcomes imputed for missing participants who have not died.

**Secondary outcomes in the NUCLEOT trial showing mean differences in modified vs standard formula of Maths and English reading exams as within-trial SD-scores at age 11 years (KS2, final year of primary school) and odds ratios in modified vs standard formula of ever being eligible for special educational needs (SEN) support**

| NUCLEO<br>N <sub>I</sub> =99, N <sub>C</sub> =97 |            |             |
|--------------------------------------------------|------------|-------------|
|                                                  | SMD        | 95% CI      |
| Within-trial standardised grades:                |            |             |
| KS2 Maths (age 11)                               | 0.17       | -0.12, 0.46 |
| KS2 English (age 11)                             | 0.00       | -0.28, 0.28 |
| Other secondary outcomes:                        | Odds ratio | 95% CI      |
| Ever qualified for special educational needs     | 0.50       | 0.25, 1.01  |



## References

1. Young L, Embleton ND, McGuire W. Nutrient-enriched formula versus standard formula for preterm infants following hospital discharge. *Cochrane Database of Systematic Reviews*. 2016;12(12):CD004696.
2. Singhal A, Kennedy K, Lanigan J, Fewtrell M, Cole TJ, Stephenson T, et al. Nutrition in infancy and long-term risk of obesity: evidence from 2 randomized controlled trials. *The American journal of clinical nutrition*. 2010;92(5):1133-44.
3. Embleton ND, Wood CL, Pearce MS, Brunskill G, Grahame V. Early diet in preterm infants and later cognition: 10-year follow-up of a randomized controlled trial. *Pediatric Research*. 2021.
4. Sun H, Como PG, Downey LC, Murphy D, Ariagno RL, Rodriguez W. Infant formula and neurocognitive outcomes: impact of study end-point selection. *J Perinatol*. 2015;35(10):867-74.
5. Gibson RA, Makrides M. Long-chain polyunsaturated fatty acids in breast milk: are they essential? *Advances in experimental medicine and biology*. 2001;501:375-83.
6. Neuringer M, Connor WE. n-3 fatty acids in the brain and retina: evidence for their essentiality. *Nutrition Reviews*. 1986;44(9):285-94.
7. Woods J, Ward G, Salem N. Is Docosahexaenoic Acid Necessary in Infant Formula? Evaluation of High Linolenate Diets in the Neonatal Rat. *Pediatric Research*. 1996;40(5):687-94.
8. Lapillonne A, Groh-Wargo S, Lozano Gonzalez CH, Uauy R. Lipid Needs of Preterm Infants: Updated Recommendations. *The Journal of pediatrics*. 2013;162(3, Supplement):S37-S47.
9. Jasani B, Simmer K, Patole SK, Rao SC. Long chain polyunsaturated fatty acid supplementation in infants born at term. *The Cochrane database of systematic reviews*. 2017;3:CD000376.
10. Moon K, Rao S, Patole S, Simmer K, Schulzke S. Longchain polyunsaturated fatty acid supplementation in preterm infants: Updated cochrane review. *Journal of Paediatrics and Child Health*. 2017;53 (Supplement 2):69-70.
11. Verfuenden ML, Dib S, Jerrim J, Fewtrell M, Gilbert RE. Effect of long-chain polyunsaturated fatty acids in infant formula on long-term cognitive function in childhood: A systematic review and meta-analysis of randomised controlled trials. *PLOS ONE*. 2020;15(11):e0241800.
12. Halterman JS, Kaczorowski JM, Aligne CA, Auinger P, Szilagyi PG. Iron Deficiency and Cognitive Achievement Among School-Aged Children and Adolescents in the United States. *Pediatrics*. 2001;107(6):1381-6.
13. Lozoff B, Georgieff MK. Iron Deficiency and Brain Development. *Seminars in Pediatric Neurology*. 2006;13(3):158-65.
14. Jaeggi T, Kortman GAM, Moretti D, Chassard C, Holding P, Dostal A, et al. Iron fortification adversely affects the gut microbiome, increases pathogen abundance and induces intestinal inflammation in Kenyan infants. *Gut*. 2015;64(5):731-42.
15. Gahagan S, Delker E, Blanco E, Burrows R, Lozoff B. Randomized Controlled Trial of Iron-Fortified versus Low-Iron Infant Formula: Developmental Outcomes at 16 Years. *The Journal of pediatrics*. 2019;212:124-30.e1.
